# Supplementary material for: Pangenome-genotyped structural variation improves molecular phenotype mapping in cattle
Source: HighWire-hosted journal article supplement (doi:10.1101/gr.278267.123), 2024-02-01
Supplement: Supplemental_Table_S2.xlsx [file Supplemental_Table_S2.xlsx]

## Sheet: Supplementary_Table_S2
phe_id	dist_phe_var	var_id	Size	bwd_pval	bwd_slope	Reason
ENSBTAG00000020630	-562541	11_50581272_INDEL_ATTTGGCTGCGATCCAAAAGTCTACAAATAATAAATGCTGGAGAGGGTGTGGAGAAAAGGGAACCCTCTTACACTGTTGGTGGGAATGCAAACTAGTACAGCCACTATGGAGAACAGTGTGGAGATTCCTTAAAAAACTGGAAATAGAACTGCCTTATGATCCAGCAACCCCACTGCTGGGCATACACACTGAGGAAACCAGAAGGGAAAGAGACACGTGTACCCCAATGTTCATCGCAGCACTGTTTATAATAGCCAAGACATGGAAGCAACCTAGATGTCCATCAGCAGATGAATGGATAAGAAAGCTGTGGTACATATACACAATGGAGTATTACTCAGCCATTAAAAAGAATACATTTGAATCAGTTCTAATGAGGT…	-863	8.56798e-06	0.645478	PG exclusive
ENSBTAG00000024539	61028	16_44118432_INDEL_TTCATTCAACCATCCATCCACTGACCCTTTCATTCATTCAACCATCCATCCACTGACCCTTTCATTCATTCAACCATCCATCCACTGACCCTTTCA_T	-95	9.35341e-05	-0.611414	PG exclusive
ENSBTAG00000006775	-929649	20_70350801_INDEL_GAGGTGCTGGTGATGATGGTGATGATGGTGGTGATGGGTGCTGGTGCTGGTGGTGACGATGGTGATGGTGGTGATGGTGATGGTGCTGGTGGTGATGGTAGTGATGGTGATGATGGTGCTGGTGGTCATGATGGTGGTGATGATGGTGATGGTGGTGATGGAAGTGGTTGTGATGATGGTGGTGATGCTGATGTTGATGATGATGGTCATGATGGTGCTGATGGTGCTGGTGATGGTGGTGCTGGTGGTGCTGGTAATGGTGGTGATGATGTCCATATGGTGGTGATGGAGGTGGTGGTCATGGTGATGGTGATGGTCATGATGATGGTGCTGGTGGTGATGGTGGTGATGATGGCCATGATGGTGGTGATGGAGGTGATG…	-844	1.65972e-05	0.721968	PG exclusive
ENSBTAG00000022160	-76376	29_48547803_INDEL_T_TCTACACGCGCTCAGTTGTCCCAGGGCGTGTGGGATCTTCCTACACGGGCTCAGTTGTCCCAGGGCGTGTGGGATCTTCCTACACGGGCTCAGTTGTCCCAGGGCGTGTGGGATCTTTCTACACGGGCTCAGTTGTCCCAGGGCGTGTGGGATCTTCCTACACGGGCTCAGTTGTCCCAGGGCGTGTGGGATCTTCCTACACGGGCTCAGTTGTCCCAGGGCGTGTGGGATCTTCCTACACGGGCTCAGTTGTCCCAGGGCGTGTGGGATCTTC	273	7.95279e-06	-0.910742	PG exclusive
ENSBTAG00000014441	-26013	1_56280167_INDEL_C_CCATCCAGACATCTCATGCTCTTTTGTCCCCTTCACCTCCTGCCCCCAATTCCT	53	9.91426e-06	-0.638337	SV top hit
ENSBTAG00000015198	129698	1_131145050_INDEL_TCTAAAACATAAAATCTATTTTTTTTTTATTAAAAATTTCTTTTTTTGAACTGCAGTCTTAGGCCCTGAGATGCAGTTTTCTTTACATCTGTCCATGATGCCTGTGGACTCCCACCTCCGACCCAAAGAAACCAAGTCCTCCCGAGAGCTCAGCC_T	-154	5.59857e-12	1.61385	SV top hit
ENSBTAG00000007039	22993	1_146551120_INDEL_T_TAGGGACTGTCCACCCGAGTGTAGAGTGTGATGACATGATGGGGTCTCACCAGGGACTGTCCACCCGAGTGTAGAGTGTGATGACATGATGGGGTCTCACCAGGGACTGTCCACCCGAGTGTAGAGTGTGATGACATGACGGCGTCTCCCCAGGGACTGTCCACCCGAGTGTAGAGTGTGATGACATGATGGGGTCTCACCAGAGACTGTCCACCCGAGTGTAGAGTGTGATGACATGATGGGGTCTCACC	250	1.89795e-08	-0.881468	SV top hit
ENSBTAG00000043956	-107612	2_15839284_INDEL_CTATTCCATCACCACAAAGATCTCCCACTCCCCCAAGTGCCTTTTATAGCTACATCGAATTCCCTCCCTTCCTCCATCCTGGCTAACCTCTGGCAACTATTAATCTATTTCTTGTCTCTAAAATTTTATCATTTCCAGAATGT_C	-142	1.29525e-06	-0.747498	SV top hit
ENSBTAG00000024288	-24969	3_39781161_INDEL_C_CTAATATTATTATATACAAAATATTATATATTTGTATATATATTATACAAATTATATATTTGTATATACAAAAATATATACAAATTTTATATACAAATTATATATTTGTATATAAAATATTATATACAAAATAATATACTAATATTATTATATACAAAACACCACTAATATTATTATATACAAAACACCACTAATATTATTATATACAAA	209	2.4825e-16	1.08972	SV top hit
ENSBTAG00000047605	-9766	4_99065240_INDEL_T_TGCGACCCCATAGACCGTAGCCCACCAGGCTTCCCTGTCCCTGGCATTCTCCAGGCAAGAACACTGGAGTGGGTTGCCATTTCCTTCTCCAATGCATGAAAGTGAAAAGTGAAAGTGAAGTCGCTCAGTCATGTCCGACTCTTA	143	2.02414e-15	-0.924653	SV top hit
ENSBTAG00000003864	43339	4_99481913_INDEL_TCTTCAAACATTATTGCACTTTAACTTTCATAATTTGACAATGCATTCAATGAAGCAATCTGCAGACTAGCTTTAACAGACAAATTAAAAACACTTTTAAGCAGACAGGAACGTCCTAAATTGTTTATTAGGTAAGGACTTTACAAACATCACGTGTTAGCGGTAGCGGTGGAGCTGGAGAGTATTGCGCCTTCTCCACGCTGCGCGGCGAGAGCCACCAGTAGTGTGGTGGAACTTGTGACCCTTGCCCAGGCCGCGGCTCTTTCTGCCTGCAGACGTCAGCCCCCGCATCTCCCTGTGCTTATGCACTGGTTTGGTGATCCATTGGGTGTCAGGGTTTCTTCTGATAGCTTTATGGAATGGATCAATGAGGATAACCTCA…	-877	3.97684e-27	-1.20443	SV top hit
ENSBTAG00000015551	0	4_99481913_INDEL_TCTTCAAACATTATTGCACTTTAACTTTCATAATTTGACAATGCATTCAATGAAGCAATCTGCAGACTAGCTTTAACAGACAAATTAAAAACACTTTTAAGCAGACAGGAACGTCCTAAATTGTTTATTAGGTAAGGACTTTACAAACATCACGTGTTAGCGGTAGCGGTGGAGCTGGAGAGTATTGCGCCTTCTCCACGCTGCGCGGCGAGAGCCACCAGTAGTGTGGTGGAACTTGTGACCCTTGCCCAGGCCGCGGCTCTTTCTGCCTGCAGACGTCAGCCCCCGCATCTCCCTGTGCTTATGCACTGGTTTGGTGATCCATTGGGTGTCAGGGTTTCTTCTGATAGCTTTATGGAATGGATCAATGAGGATAACCTCA…	-877	2.48879e-29	-1.23284	SV top hit
ENSBTAG00000026977	116544	5_10071225_INDEL_CTTTTAAACACTGGTGAAAGAAATCAAAGAGGACACTAATAGATGGAGAAATATACCATGTTCATGGATTGGAAGAATCAATATAGTGAAAATGAGTATACTACCCAAAGCAATTTATAGATTCAACGCAATCCCTATCAAGCTACCAACAGTATTCTTCACAGAGCTAGAACAAATAATTTCACAATTTGTATGGAAATACAAAAAACCTCGAATAGCCAAAGCGATCTTGAGAAAGAAGAATGGAACTGGAGGAATCAACTTACCTGACTTCAGGCTCTACTACAAAGCCACAGTTATCAAGACAGTATGGTACTGGCACAAAGACAGAAATATTGATCAATGGAATAAAATAGAAAGCCCAGAGATAAATCCACGCACA…	-698	2.05706e-05	-0.5184	SV top hit
ENSBTAG00000002227	393311	5_54954146_INDEL_CAGTATACCTGTCATGTAAGTATACCTGTCATGTAAGTACACCTGTCATGTA_C	-51	9.35773e-09	1.35316	SV top hit
ENSBTAG00000001057	32809	5_113638212_INDEL_CAATCCTCAGGGACACATAATGTTTCAAGGCAGAGGCCCGACACACAATCCTCAGGGACACATA_C	-63	3.2321e-05	-0.756658	SV top hit
ENSBTAG00000006683	17646	6_116283443_INDEL_C_CACACTGGATCCCACCCCCTTACACACTGGATCCCAGCCCCGTATACACTGGATCCCACCCCCTTACACAATGGATCCCACCTCCTCCTCTGGATCCCACCCCCTTCTACACTGGATCTCATCCCCTTCTACACTGGATCCCACCTCCTCCTCTGGATCCCACCCCCTTCTACACTGGATCTCATCCCCTTCTACACTGGATCCCAGCTCCTCCTACTCTGGATCCCACCCCCTTCTACACTGGATCCCAGCTCCTCCTCCTCTGGATTGTACCCCCTTATACACTGGATCCAACCCCCTTCTACACTGGATCCAAGCTCCTCCTACTCTGGATCCCACCCCCTTCTACACTGGATCACACCGCCTTCTACACTGGATC…	670	2.26875e-06	0.825451	SV top hit
ENSBTAG00000003103	-167426	7_37944012_INDEL_TAACAGAAATAAAACTGAAAATTTCATGAATTTACGTAAATAGCACACTTAACCAATGGATG_T	-61	8.59651e-06	-0.600323	SV top hit
ENSBTAG00000008962	-797030	8_91917309_INDEL_C_CCATCTTTGAATTCTACCTATCATGTTCCTTGTTCTACTCTGCTTAAGATTTAAATTCCAAAGACTGATCTGTTTAA	76	2.55327e-09	0.831339	SV top hit
ENSBTAG00000032869	263601	10_26332517_INDEL_TGTTCCTCGGTTCTTTGTCTCGTCACAACAAAGATTTGGAGTGACGGACATTAAAGCCCTCAGCGCGTCACAGCTCTCGGGTCTTGGACAAACCATGCTACAGCTCTTAGGCAAATCAGTGTTACAGCTCTATTTTATTTAGAAGATAGCAGGAGAATCCAAGATAGCAGGAGAAGAGAGCGGAGGAGCGTGCGGGGGAGGAAGGGAGGGAGGGAGGGAGGGGGAGAGAGAGAGTCCGTGAGAAAGCGCTTTGACTCCTCCTTTTATGTTTTTTCCTCCACCTGAGCCTGCCCTATGCAAATTGGGCTTAGCCAGGAGTGCTGTTTGTTCTGCCTGAAGTCTTCACTCTGGTCCTTGGACCTTCCTTTCACCTTCCTTGTC…	-562	1.79032e-06	0.881073	SV top hit
ENSBTAG00000006470	211496	10_37917838_INDEL_C_CTGTAGTTGGGCGGTTAGACAAAGTGGAAAAGCTTTCTGGGGATATGTGCTGAGTTGA	57	5.69232e-05	0.45467	SV top hit
ENSBTAG00000011494	-179053	10_43976374_INDEL_ATGTTAGTAGAAATGTCTTGATAGATACTTCTGGAATGTGGCACTACTGAACATCTGTACACACGCAGTGGACAGACCCTAAATTGGGCCCCCTTGATCCCCGTCTTCTGGTATTCATGGCCTGTGTAAACCCCTTTTCTTGTGAGTGAGACCCAGGACCTGCTTCTAACTGACACGCTATGGCAAAGGCACGGACTGGCAGTCCCATGACTGTGTCCATTATTCCAGATCACACTCCTTGTTGTTGACTCTCACTTCTGCTTTTCTGCTGCCGTTATAGAAGCAAGGAAACTCTGCCACTCCTTCACCATCCTTCCTGCATCCTTGTCCCTGAACTCCTGTGGCTACAGTTTCAGGTCACTGCTCTGGCTTCCACTGACC…	-2181	5.0219e-05	-0.794332	SV top hit
ENSBTAG00000020630	-562541	11_50581272_INDEL_ATTTGGCTGCGATCCAAAAGTCTACAAATAATAAATGCTGGAGAGGGTGTGGAGAAAAGGGAACCCTCTTACACTGTTGGTGGGAATGCAAACTAGTACAGCCACTATGGAGAACAGTGTGGAGATTCCTTAAAAAACTGGAAATAGAACTGCCTTATGATCCAGCAACCCCACTGCTGGGCATACACACTGAGGAAACCAGAAGGGAAAGAGACACGTGTACCCCAATGTTCATCGCAGCACTGTTTATAATAGCCAAGACATGGAAGCAACCTAGATGTCCATCAGCAGATGAATGGATAAGAAAGCTGTGGTACATATACACAATGGAGTATTACTCAGCCATTAAAAAGAATACATTTGAATCAGTTCTAATGAGGT…	-863	8.56798e-06	0.645478	SV top hit
ENSBTAG00000009343	466117	11_67524764_INDEL_T_TGAAAATTACCCAAGGGGAGCGGGGGGAAGGGGAGGAAAAAAAAAAAAAAA	50	8.82198e-05	-0.808876	SV top hit
ENSBTAG00000048781	-6080	11_104137996_INDEL_CCCCCTGCCCCCTTCTGCGCCCCCGGGTCCCCAGTCCCCCACGTCCCCAGGCTG_C	-53	4.84858e-10	-1.00887	SV top hit
ENSBTAG00000052185	328813	12_75339058_INDEL_A_AAAAGTGGTTTAATTAGACCATCGAGTCCAGGAAGAAAAGCACCAAACTGCAGACGTGAGAAATG	64	9.18984e-05	1.73881	SV top hit
ENSBTAG00000000291	91118	13_12190635_INDEL_A_ACCTTACTTCTTACGGGCTTCCCTGGTGATTCAGACGGTAAAGACTCTGCCTGCCAATGCAGGAGACTCGGGTTTGATCCCTGGATGGGGAAGATCACCTGGAGAAGGTAATGGTAACCCACTCCAGTATTCTTGCTTGAAGAAATCTGTGGACAGAGGAGCCTGGCAGGCTACAGTCCATGGAATCACGAAGAGTCAG	198	9.28887e-07	-0.747827	SV top hit
ENSBTAG00000006278	-251172	13_64812316_INDEL_A_AAGAGGAGCCACCAGGATGAGAAGCCCGTGCTCCACGAGAGGAGCCACCAGGATGAGAAGCCCGTGCTCCACGAGAGGAGCCACCAGGATGAGAAGCCCGTGCTCCACG	108	2.80743e-05	-0.883161	SV top hit
ENSBTAG00000049782	660301	13_73587243_INDEL_CTTGGCAAAACTAATACAATTATGTAAAGTTTAAAAATTAAATAAAATTAAAAAAAAAAA_C	-59	3.05797e-05	0.578096	SV top hit
ENSBTAG00000013955	142590	14_3342962_INDEL_G_GTCAGGAAGATTCACTGGAGAAGGGATAGTCTGCCCACTCCAGTATCCTTGGGCTTCCCTTGTGGCTCAGCTGGTAAAGAATCCGCCTGCAATGCAGGAGACCCTGGTTTGATTCCTGGC	119	2.5027e-07	1.11687	SV top hit
ENSBTAG00000050111	-278026	15_49001256_INDEL_CAAAAATGAAACATGTATGCTTGTGTGTGTGTGTGTATATATATATATATATATATATACACACAAAACACATTTATACTA_C	-80	8.49056e-17	0.954248	SV top hit
ENSBTAG00000014847	70292	15_57829264_INDEL_GACCAACCTAGACAGCATGTTAAAAGGCAGAGACATTACTTTACCAGCAAGGTCCATCTAGTCAAAGCTCTGGTTTTTCCAGTAGTCA_G	-87	3.76698e-06	0.738711	SV top hit
ENSBTAG00000024539	61028	16_44118432_INDEL_TTCATTCAACCATCCATCCACTGACCCTTTCATTCATTCAACCATCCATCCACTGACCCTTTCATTCATTCAACCATCCATCCACTGACCCTTTCA_T	-95	9.35341e-05	-0.611414	SV top hit
ENSBTAG00000027182	343232	17_9926879_INDEL_T_TAGTGGTAAAGAACCCGCCTGCCAGTGCAGGAGATGTAAGAGACCTGGTTTTAATCCCTGAATTGGGAAGATTCTCTGGAGAAGGACATGGCAACCCACTCTACTATTCTTGCCTGGAGAATCCCATGGATGGAGGAGCCTGATGGACTATGGTCCACAGGGTCACAAAGAGTCAGACATGAATGAAGCAACTGAACATGCACGCACATACTATATTTATCTATATTATAAAATATATATAGCACAGGGAACTCTACTCAATACTCTGTAATGACCTCTATGGGAAAAGAATCTTGAAAAGAGTGGAGATATATATATAGATAGATAGATAGATACCCTAATTATAAATATATATATATATATATATATATCCTGTGTAT…	545	4.08562e-10	-0.737826	SV top hit
ENSBTAG00000034522	-509938	17_11258716_INDEL_A_ATCATTTGTGAGTCAAGAATGAATCATAGTCTAAGTGATGAAAGCACAAAATAATAGGACTCTATTGTAAAATACATGAAAAGAAAGTCTAATAGGAAAAACTGAGTTCATAAAATAGAAAGGAAATGGTTGCTGCTAATTTTTCAAAGAACAGACATAGAAATTTGAGGCTATTTTTCTATGGATCTGGAAAGACCTTTAAATTGTGCCTGACCTGGGACTTTTAGCACAAAAGCTTCTACGGCTAGGATTGTCTGCTTTGTTGGTAGAGCATTGTGATTCTCATTTAGCATGTCCAAATTTGAGATAGAATTGCAGGATTAACTTCTCTATTTCTATTTATCAGAATGGAGGTTAGATGCTGAAAAAAGTCACCTAA…	917	2.74875e-06	0.842531	SV top hit
ENSBTAG00000015811	0	17_18449267_INDEL_TAAAGAAAGTGAGACAGAGAAGTAAGGAGAGTCTTCATTTTATCAGCCTTGACCTTTCTGAGCATGGAGAGCAGAAACAAGGAGAGCAACTCCACAGAGAAATCTGAAGAACGTATGAGTTACAGACTTACATCAGTAGAAGCTGAAAAGGGACAGGGAACTTCTGGTGAAGCAGAGATAGCAAAAAATTCAGCAAAGGGGACCAAAAGAAAAAGAGATACAAAAAACAGCACAGCTTGCCGTCCAGGAGACATGTCACAGCGTTGTGACTGTGTGAAACCTACGAAGACACCGACGCAGATCCCCATCCCCCCTCTACCTGCTGTCCTGCCGCCTGTCAACCTGGTCCATAGGGACGTCATTCGTGCTTGGTGCCAGCAG…	-3105	4.62411e-14	-0.83634	SV top hit
ENSBTAG00000019891	-323118	17_72370701_INDEL_GGGCAGGGTTGGAGGGGGCGGGGGGTGATGGTCACATCACTGGGCGGGTAGGTA_G	-53	3.81219e-05	-0.581361	SV top hit
ENSBTAG00000022783	-186280	18_29948163_INDEL_TCATCTCTTTTTTTTTTTTTTTTTTGAACTTCATATTTCTTTTTTTTTTTTTTAAGATTTGTATTTTTTTTTTTCTCTAATTTTATTTTATTTTTAAACTTTACATAATTGTATTAGTTTTGCCAAATATCAAAATGAATCCGCCACAGGTATACATGTGTTCCCCATCCCGAACCCTCCTCCCTCCTCCCTCCCCATACCATCCCTCTGGGCCGTCCCAGTGCACCAGCCCCAAGCATCCAGCATCATGCATCGAACCTGGACTGGCAACTCGTTTCCTACATGATATTTTACATGTTTCATTGCCATTCTCCCAAATCTTCCCACCCTCTCCCTCTCCCACAGAGTCCATAAGACTGTTCTATACATCAGTGTTTCTTT…	-409	4.8115e-12	0.783396	SV top hit
ENSBTAG00000011616	-168252	19_9427531_INDEL_T_TAAGAATTGAGAAATAACCCAAAATGAAACACAGAGAGAAAAAAAATTATTTTTAATGAAAAGGTAATCACTGAACAGCTAAAAATGAATGAATAAAATTATTTTTTAAAGTTCAAAAAAAAAAAAAAAAAAAAAAAAA	138	2.54974e-06	1.01053	SV top hit
ENSBTAG00000054102	-106323	19_62391084_INDEL_C_CCACACACACCACACACACACCACACACCACACACACATACACCACACACACACCACACATACCACACACACACATAACACACACACAACAAACACACATGACACACATACACCACACACACACCACACATACCACACACACACATAACACACACACAACAAACACACATGACACACATACAACACACACACACACACATAACACACATACACCACACACACACCACACACACACCACACACACACACAACA	251	5.48913e-09	-1.22988	SV top hit
ENSBTAG00000001061	167911	19_62832442_INDEL_G_GCCCTGGTGCCAGCGAGGTGGGACCCGCTGGCTGTTCTACTGGCCCCTGGTGCCAGCGAGGTGGGGCCCGCTGGCTGTTCTACTGGCCCCTGGTGCCAGCGAGGTGGGGCCCGCTGGCTGTTCTACTGGCCCCTGGTGCCAGCGAGGTGGGGCCCGCTGGCTGTTCTACTGGCCCTGGTGCCAGCGAGGTGGGGCCCGCTGGCTGTTCTACTGGCCCCTGGTGCCAGCGAGGTGGGGCCCGCTGGCTGTTCTACTGGCCCTGGTGCCAGCGAGGTGGGGCCCGCTGGCTGTTCTACTGGCCCTGGTGCCAGCGAGGTGGGGCCCGCTGGCTGTTCTACTGGCCCCTGGTGCCAGCGAGGTGGGGCCCGCTGGCTGTTCT…	1863	3.57086e-07	1.60086	SV top hit
ENSBTAG00000006775	-929649	20_70350801_INDEL_GAGGTGCTGGTGATGATGGTGATGATGGTGGTGATGGGTGCTGGTGCTGGTGGTGACGATGGTGATGGTGGTGATGGTGATGGTGCTGGTGGTGATGGTAGTGATGGTGATGATGGTGCTGGTGGTCATGATGGTGGTGATGATGGTGATGGTGGTGATGGAAGTGGTTGTGATGATGGTGGTGATGCTGATGTTGATGATGATGGTCATGATGGTGCTGATGGTGCTGGTGATGGTGGTGCTGGTGGTGCTGGTAATGGTGGTGATGATGTCCATATGGTGGTGATGGAGGTGGTGGTCATGGTGATGGTGATGGTCATGATGATGGTGCTGGTGGTGATGGTGGTGATGATGGCCATGATGGTGGTGATGGAGGTGATG…	-844	1.65972e-05	0.721968	SV top hit
ENSBTAG00000026527	542839	20_71151904_INDEL_T_TGGTAGAGTCACGTCCATGTTAAACGTGACTCTCAGCGACGGGTCACCCCC	50	2.00116e-05	0.467828	SV top hit
ENSBTAG00000003132	-25689	21_31041012_INDEL_A_ACACGACTGAAGCGACTTAGCAGCAGCAGTGTTTATCTGTTATTCTCAAACTCTTAATTTTTCCCTCCCCCACCTTTCCCCTTTGGTAAATTTGTTTTCTGAGTCTGTGAGTCTGTTTCTGATTTATAAGTAAGGT	135	2.69271e-06	0.614106	SV top hit
ENSBTAG00000007109	9990	21_58568918_INDEL_CCCTCTCTGGGCCTCAGTTTTCCTGAGTTACAGTCTCCAAGTCGATGCTCAAGTGCTGTGTGACCTCAGCCACATCCCTGTCCCTCTCTGGGCCTCAGTTTTCCTGAGTTATAGTCTCCAAGTCGATGCTCAAGTGCTGTGCGACCTCAGCCACATCCCTGTCCCTCTCTGGGCCTCAGTTTTCCTGAGTTACAGTCTCCAAGTCGATGCTCAAGTGCTGTGTGACCTCAGCCACATTCCTGTCCCTCTCTGGGCCTCAGTTTTCCTGAGTTACAGTCTCCAAGTCGATGCTCAAGCGCTGTGTGACCTCAGCCACATCCCTGTG_C	-324	3.05976e-09	0.767176	SV top hit
ENSBTAG00000004117	-9298	22_2807984_INDEL_T_TTAAAACTTCCATTAGCCATGTCTCTGTGGTCTGTACTCAGCAGCCCAGTATGGGGTCCTGGCTCTGCCCTCCTCATTCTGGTCCTCCTGCTTAAAAAAAAAAAAAAAAAA	110	1.31859e-14	-0.99315	SV top hit
ENSBTAG00000001889	-8338	22_39001060_INDEL_ATTTTTTTTTTGGGGGTGCCCGGGCTTAGTTGCCCCGTGGCCTGTGGGGTCTTCCTGGACCAGAGATCGAACCCACGTCTCCCGCGTTGGCAGGCAGATTCTTTACCGCTGCCTTGCAT_A	-118	6.59723e-27	1.22725	SV top hit
ENSBTAG00000012870	94875	23_4565407_INDEL_A_ACTGTAAATATACCATGTTCATGGATTGGAAGAATCAATATAGTGAAAATGAGTATACTACCCAAAGCAATTTATAGATTCAACGCAATCCCTATCAAGCTACCAACAGTATTCTTCACAGAGCTAGAACAAATAATTTCACAATTTGTATGGAAATACAAAAAACCTCGAATAGCCAAAGCGATCTTGAGAAAGAAGAATGGAACTGGAGGAATCAACCTACCTGACTTCAGGCTCTACTACAAAGCCACAGTTATCAAGACAGTATGGTACTGGCACAAAGACAGAAATATTGATCAATGGAATAAAATAGAAAGCCCAGAGATAAATCCACGCACATATGGACACCTTATCTTTGACAAAGGAGGCAAGAATATACA…	846	8.0562e-09	-0.703633	SV top hit
ENSBTAG00000025304	262311	23_34340758_INDEL_C_CGTAGGGAGGAGTCTGTGCACCGCAAGTAGGGAGGAGTCTGTGCACCGCAA	50	1.08093e-05	0.517225	SV top hit
ENSBTAG00000011622	11291	24_21134872_INDEL_CTTTGGTAACCACAAGTTTATTTTCTCTAAGTGTGTTTTACATTCATTTATATTATTTTTTAGATTTTGCACATGTGATATCATGTGCAAG_C	-90	2.5413e-11	0.716781	SV top hit
ENSBTAG00000002374	111446	25_27604763_INDEL_T_TTGGAAATTTTAATTCTTTTTTTTTTTTTTTTTCGAGCCCCGGGGACCCCCACCTTCCCCCCATCAAGCCCCGGGGACCCCCATCTCTGCCTCCCTCAAGCCACCGGGACCCC	112	9.01318e-07	-0.613985	SV top hit
ENSBTAG00000002670	-5390	28_44601251_INDEL_GGTTTTGCTGAGGGTGAGTTCAGGCGTGACCACCGAGGGCCCCACTAGGGAAGGTCCAAGTTTTGCTGAGGGTGAGTTCAGGCGTGACCACCGAGGGCCCCACTAGGGAAGGTCCAA_G	-116	4.94027e-12	0.985114	SV top hit
ENSBTAG00000016470	-429180	29_47880247_INDEL_GAACATGCCGGGCGCCGCCCAGCCCAGCCTCCCACTGGTCCAGGGCCCGGGGATTGTGAGGAGGCTCCTTAGGCA_G	-74	1.00717e-06	-1.1745	SV top hit
ENSBTAG00000018274	680179	29_48053399_INDEL_GACGGTCCACGGATAGACGACACGGTTCACGGATAGACGACACGGTCCACGGATAGACGAC_G	-60	1.69499e-05	0.648385	SV top hit
ENSBTAG00000022160	-76376	29_48547803_INDEL_T_TCTACACGCGCTCAGTTGTCCCAGGGCGTGTGGGATCTTCCTACACGGGCTCAGTTGTCCCAGGGCGTGTGGGATCTTCCTACACGGGCTCAGTTGTCCCAGGGCGTGTGGGATCTTTCTACACGGGCTCAGTTGTCCCAGGGCGTGTGGGATCTTCCTACACGGGCTCAGTTGTCCCAGGGCGTGTGGGATCTTCCTACACGGGCTCAGTTGTCCCAGGGCGTGTGGGATCTTCCTACACGGGCTCAGTTGTCCCAGGGCGTGTGGGATCTTC	273	7.95279e-06	-0.910742	SV top hit
2:118967372:118969128:clu_44148	-40328	2_118926093_INDEL_CAAGCCTAAGACCTGCTACAAGGAAGCTTCTCCTACCACTGACAGGTACCCCATTTGGAAGTAGGATCATATTTGGCCAAGTTTGATAAGCTTTTGCAGTTCTAAAATAAATCAGCATCAACTTTTATAAGGTTCATTTTACAGTATAACACATTTGTAAATAGAAATCTATATTACATACTGTTGCCTTAAGTAAGAGGGGATTTAGACACTACAGGTGTTGGTGGTAATATAAAGATAAGGCACAGGCAACTAACGTGAACAAAATTATGCTAATAAAATTGAGGAGGAAGCTAGAAACATGATTTGTTATGTTGATAGGAGGAAATTATAATAGCACTGCCAGGAATATCTTGAAAAAGAAGAAAGATAATTTTCACT…	-884	0.79293	-0.0447501	PG exclusive
2:118967372:118969128:clu_44148	-40328	2_118926093_INDEL_CAAGCCTAAGACCTGCTACAAGGAAGCTTCTCCTACCACTGACAGGTACCCCATTTGGAAGTAGGATCATATTTGGCCAAGTTTGATAAGCTTTTGCAGTTCTAAAATAAATCAGCATCAACTTTTATAAGGTTCATTTTACAGTATAACACATTTGTAAATAGAAATCTATATTACATACTGTTGCCTTAAGTAAGAGGGGATTTAGACACTACAGGTGTTGGTGGTAATATAAAGATAAGGCACAGGCAACTAACGTGAACAAAATTATGCTAATAAAATTGAGGAGGAAGCTAGAAACATGATTTGTTATGTTGATAGGAGGAAATTATAATAGCACTGCCAGGAATATCTTGAAAAAGAAGAAAGATAATTTTCACT…	-884	1.3577e-06	-0.783419	PG exclusive
10:100171233:100172672:clu_5881	75450	10_100171914_INDEL_CCGGGGATCCGTCTCAGAAACGCGGCTGGGCCGGCCGAGGGCGCCCCTTCA_C	-50	2.58674e-06	-0.484368	PG exclusive
11:64948274:64950781:clu_11200	-901268	11_63907254_INDEL_C_CAGAAAAGCAAGCAGATGAATGGATAAGAAAGCTGTGGTACATATACACAATGGAGTATTACTCAGCCATTAAAAAGAATACATTTGAATCAGTTCTAATGAGGTGGATGAAACTGGAGCCTATTATACAGAGTGAAGTAAGCCAGAAGGAAAAACATAAATACAGTATTCTAACGCATATATATGGAATTTAGAAAGATGGTAACAATAACCCTGTGTACGAGACAGCAAAAGAGACACTGATGTATAGAACAGTCTTATGGACTCTGTGGGAGAGGGAGAGGGTGGGAAGATTTGGGAGAATGACATTGTAACATGTAAAATATCATGTAAGAAACGAGTTGCCAGTCCAGGTTCGATGCACGATACTGGATGCTTG…	547	6.80691e-07	-0.631035	PG exclusive
13:74551590:74552488:clu_16416	754761	13_73810018_INDEL_C_CGGGAACTGGTGACTGATCTCGGGAACACTCTTACTGTTCTCAATCAATGTACAGGGTAAAACTCAGAAAGAACGAAATGCAGGAGATCTGTACTGATCCCGGGAACACTCTTACTGTTCTCAATCGATGTACAGGGTA	138	2.27678e-05	-0.820639	PG exclusive
13:74551590:74552488:clu_16416	754761	13_73810018_INDEL_C_CGGGAACTGGTGACTGATCTCGGGAACACTCTTACTGTTCTCAATCAATGTACAGGGTAAAACTCAGAAAGAACGAAATGCAGGAGATCTGTACTGATCCCGGGAACACTCTTACTGTTCTCAATCGATGTACAGGGTA	138	2.0566e-08	-1.05586	PG exclusive
14:730474:730634:clu_19980	599037	14_133719_INDEL_C_CACCGGGCTCCCCCGTCCCTGGGACTCTCCAGGCAAGAACACTGGAGTGGGTTGCCATTTCCTTCTCCAATGCAGGAAAATGAAAAGTGAAAGTGAAGTCGCTCAGTCGTGTCTGACTCTTCGTGACCCCATGGACTGCAGCCT	143	3.43289e-06	-0.725868	PG exclusive
14:48856402:48858056:clu_19463	-290408	14_48339115_INDEL_GAATGAGTCTTTTTTTTTTTTTTGATTTCCCCAATTCTTTATTTAAAAAAGTATAGCTTGAAACAAGTGGA_G	-70	4.57967e-07	0.684481	PG exclusive
17:69098068:69098760:clu_28751	543003	17_69514214_INDEL_CCCCCCCCCCCCCA_C	-13	0.965737	-0.00895996	PG exclusive
17:69098068:69098760:clu_28751	543003	17_69514214_INDEL_CCCCCCCCCCCCCA_C	-13	1.9914e-06	-0.944657	PG exclusive
19:7775382:7786431:clu_35528	-48308	19_7835372_INDEL_C_CAAGACCATCTCCAGCCAGTCCAGGTTCAATGCACGATACTGGATGCTTGGGGCTAGTGCACTGGGACGACCCAGAGGGATGGTATGGGGAGGGAGGAGGGAGGAGGGTTCAGGATGGGGAGCACATGTATACCTGTGATGGATTCATTTTGATATTTGGCAAAACTAATACAATTATGTAAAGTTTAAAAAAAAAAAAAAAAA	203	7.40322e-07	0.620481	PG exclusive
4:70154970:70162095:clu_74749	404776	4_69754876_INDEL_ATGGAATTTAGAAAGATGGTAACAATAACCCGGTGTACGAGACAGCAAAAGAGACACTGATGTATAGAACAGTCTTATGGACTCTGTGGGAGAGGGAGAGGGTGGGAAGATTTGGGAGAATGGCATTGAAACATGAAAAATATGTATGAAACGAGATGCCAGTCCAGGTTCGATGCACGATACTGGATGCTTGGGGCTAGTGCACTGGGACGACCCAGAGGGATGGTATGGGGAGGGAGGAGGGAGGAGGGTTCAGGATGGGGAACACATGTATACCTGTGGTGGATTCATTTTGATATTTGGCAAAACTAATACAATTATGTAAAGTTTAAAAATAAAATTTTTAAAAAAAGTAATTTTCTTATTCTATCATTGTCTTTTC…	-2599	1.1828e-08	0.836433	SV top hit
5:100228306:100230996:clu_77260	-57702	5_100296038_INDEL_G_GCTCAGCTTTCTTTTTTTTTTTTTTTTTTTTTTTTTTTATTCTTCCAATTTTATTTTATTTTTAAACTTTACATAATTGTATTAGTTTTGCCAAATATCAAAATGAATCCACCACAGGTATACATGTGTTCCCCATCCCGAACCCTCCTCCCTCCTCCCTCCCCATACCATCCCTCTGGGCCGTCCCAGTGCACCAGCCCCAAGCATCCAGCATCGTGCATCGAACCTGGACTGGCAACTCGTTTCCTACATGATATTTTACATGTTTCATTGCCATTCTCCCAAATCTTCCCACCCTCTCCCTCTCCCACAGAGTCCATAAGACTGTTCTATACATCAGTGTCTCTTTTGCTGTCTCGTACACCGGGTTATTGTTACC…	1954	1.13811e-13	-1.18553	SV top hit
7:17441983:17445604:clu_84381	104175	7_17329610_INDEL_TACTGTCCGTGTTACTTTACACTAGTCGTTCACCTTTTTCTCTGAACCTCAGTTTGCTTAGTATACAAAATGGGAACAATTGGAGCACTTTCCTCTAGGGATGTTTTGATAGACATGAGAAATGGTGTATATGAAACACTTCGCCCCAGGGGCTGGAGAAATAAATGTTCAGCATCTTTGTTCTCAGCCTGAGTCGTGACCTACTCCACCCTTCCTTCCACCCTCAGTTTCCCAGGGAGACACGTGTGTACCCACGTCCCCGACAGCACATTTTCAGCACCGGACTCACTGCTTAGTGGTGCCGTATCCTTGGGGGTTGATCGCTGCAGACACAGCCACAATCACCGCTGGGACCCCGTAGCCTACAGGGTACATGAACCTC…
TTTTTGTATCTCAGAAAGTTGAAGATATGAAAGTAAGCATAAGTTGATGAAGTCTGGTCCCCTTAACTCACCCATGAGGAGACTGACCTCAAATTCACATCCAAATTAATTTTGGAAGTAGGTCTAAAACCAAGCTCTCATGCTCTTACATCTCACCTAAACTCGTCTTATTTATCCCTCCGTTCATTTTCCTTCATCATTATCAAGTAAAAGAAGAAAAGTGTTTCGTGATGTCTATCACTTTCTTCAAGTACTATTTTGCCTATGCCAACAGTCCTTAAATTATGTCTTCTTTTTTTAAAAAACACCAGTGTTCTACAAAATGTAAAGACATTTTCTGCTGGAAAAATAAATCCTGGCTAAACATGTTTGGCAAGTCCCAAGTTCTGTGGCCTCTCT…	-43206	3.73152e-10	0.734138	SV top hit
8:59600053:59637289:clu_89360	-28107	8_59609182_INDEL_G_GGTTTTTTTTTTTTTTTTTTTTTTTTTTTTTTTTATTTTTCTATTATATTTATTATGTTGAAACACAGTAGTTGTTTCCTGTTAGCTAATATAAATAACATAAATAACACTGTCAAACAACAAGTTGGAAGTGCTGACAATTCTAGGCTTCAAGGTTTAACTCATGCTGCAATTACACTTTTTCATGCGGTTTGGAGTTATCCCAATATTTGTTCAGTAGATTAAAATGAGAGCATATTTAAACACCATTTATAAGCCATTATTTTGTATTTTACTAAAGCAGTTTATATAATAGTTTGGTTATGTTTGGCATAAAGGAAAAATAAAACCATTGCAGCATCTAGGCAAGAGGGTGTCAGAAACAACTTAGGACAGCTCAT…	1647	6.41414e-07	1.20327	SV top hit
9:42051719:42051902:clu_92615	-4532	9_41961852_INDEL_AAAAGGTGGGTCATGGAGCAGAGTGTCCAGTACAAAGCAGGTACTCAGTGAGGGCTCAGTAAGTGAATCTCGTCAGGCTTGCTCCTGAGTCTGTTGTGGATCTCTCTACAAGTTGTTTGGCTCCTATTAGGTAACTCTACTCATAAACACTGAGAATAATCCAGAAAAGACACCCAGGTGCTCTAGACTCAACTGGTGCTGAGTTGTAGAGTTTTTCCTTGACATTTTCTAGAACTCTGTTAGCTAACTGTCTGTTACTTCTCACTAACAGCACCCCTGCACCCATGCCTCTCTCACACAATCTAGTATTGGTGCTAACAGCAGCAACAGTGAGACAATGCCCTGTGTGATGCGCTCATTTTTTTTTCTTAACAAATAACAA…	-780	1.10645e-07	-0.875653	SV top hit
9:102764301:102770292:clu_94787	131370	9_102776565_INDEL_TACTCGGCATATGCACCTTTACATGAATCTTCCTGGATCATTCATCTAGCCCTGCATTTCTCATGATGG_T	-68	3.38559e-07	-0.90391	SV top hit
10:90434618:90451435:clu_7848	-72032	10_90423226_INDEL_T_TTCCTATGACTGGCTGAGTAAGCATGATGTTCACAGTAACTGAGAGTCAGTGAGCTCTTACTGAGTGTGA	69	3.30944e-07	0.969186	SV top hit
11:64948274:64950781:clu_11200	-901268	11_63907254_INDEL_C_CAGAAAAGCAAGCAGATGAATGGATAAGAAAGCTGTGGTACATATACACAATGGAGTATTACTCAGCCATTAAAAAGAATACATTTGAATCAGTTCTAATGAGGTGGATGAAACTGGAGCCTATTATACAGAGTGAAGTAAGCCAGAAGGAAAAACATAAATACAGTATTCTAACGCATATATATGGAATTTAGAAAGATGGTAACAATAACCCTGTGTACGAGACAGCAAAAGAGACACTGATGTATAGAACAGTCTTATGGACTCTGTGGGAGAGGGAGAGGGTGGGAAGATTTGGGAGAATGACATTGTAACATGTAAAATATCATGTAAGAAACGAGTTGCCAGTCCAGGTTCGATGCACGATACTGGATGCTTG…	547	6.80691e-07	-0.631035	SV top hit
11:101715080:101716705:clu_9817	117466	11_101716574_INDEL_G_GAGAGCCAGGTCGGCCCCGGGCCCGGCAGCTCTGGAAGCCCCGTCCTCTCTGC	52	1.97409e-10	-0.653263	SV top hit
12:15154042:15154233:clu_13771	-26766	12_15183906_INDEL_C_CACTGACACACACACACACACAGCAGTTGGATGGCTGCTGGTCTGTACTGCCTGCACGTACTCCCGCA	67	1.4582e-14	-1.53447	SV top hit
13:10223899:10224941:clu_14888	196770	13_10221508_INDEL_C_CAACTGAGTTACGGACACCGTTGGGACAACAGAGTAACGGACACTGTTGGGACA	53	3.46894e-08	-0.866071	SV top hit
13:81632642:81641872:clu_18616	-260	13_81632248_INDEL_CGCCCGCCGCCCCCTGCTGCCCGCCGCCCCCTGCTGCCCGCCGCCCCCTGCTGCCCGCCGCCCCCTGCT_C	-68	1.75001e-09	1.02088	SV top hit
14:1156984:1158020:clu_18799	56349	14_1210137_INDEL_C_CGTCCGGGTCTTACCTGGGCTCCTGGCTGTTACACTCGTCCGGGTCTTACCTGGGCTCCTGGCTGTTACACTCGTCCGGGTCTTACCTGGGCTCCTGGCTGTTACACTCGTCCGGGTCTTACCTGGGCTCTTGGCTGTTACACTAGTCTGGGTCTTACCTGGGCTCCTGGCTGTTACACTAGTCCGGGTCTTACCTGGGCTCTTGGCTGTTACACTAGTCCGGGTCTTACCTGGGCTCCTGGCTGTTACACTCGTCCGGGTCTTACCTGGGCTCCTGGCTGTTACACTCGTCCGGGTCTTACCTGGGCTCCTGGCTGTTACACTAGTCCGGGTCTTACCTGGGCTCTTGGCTGTTACACTCGTCCGGGTCTTACCTGGGC…	396	4.99042e-09	-0.920844	SV top hit
14:19831246:19831442:clu_19110	-169665	14_19659293_INDEL_G_GCACTGCACAGGCTGCACTAGTGTTAGAACACACTGCACACACTGCACTAGTGTTAGAACACACTGCACACACTGCACTGGTGCTAGACCACACTGCACACACCGCACTGGTACTAGATCATACTGCACACACACACACACAGTGCTAGACCACACTGCACACACTGCACTGGTGCTAGACCACGCTGCACACGCTGCACACACTACACTAGTGCTAGACCA	221	3.19912e-14	1.44653	SV top hit
16:76549314:76561174:clu_25685	209121	16_76538065_INDEL_C_CGGTGTGTGCATGCTTAGTGGCTCAGTCATGTCCAACCGACTCTTTTTCTAAAACACAGTGTGGGTATCTTTACGGTGTGTGCATGCTTTGTGGCTCAGTCATGTCCGACCGACTCTTTTTCTAAAACATAGTGTGGGTATCTTTAT	146	1.31579e-11	1.62021	SV top hit
17:6593508:6624285:clu_27678	269594	17_6760179_INDEL_TTCAAAACCAAAGGTAAGGAAATTCACTTAAGATTACCAAATTGATTTACCAAAATCCAAAACAGGGACATCAAAATATCACTGTACTTTACCAGCTGGTC_T	-100	2.13799e-07	0.680633	SV top hit
17:71504374:71508970:clu_28895	-12360	17_71490201_INDEL_CTCCAACTGCTGGGGACCAGCCCCAGCTGATCCAGGGTATTCGAAGGAGAGACGGCCTAGGCGACTATTTATATGCTAATTAGAGATATAGAGAACAATAGAATGAGGATAGCTCAGTAGGAAAATTCAGTGGAGAAAAGAAGCTGAGTAGCTTGGTTTACGCGGGAGACCAATAAAACTTCAAGACAAGAAGTTTGCACCACTGACGTAGGTCGCAGGCGCCCTCTCGAATAGCGGAAGGTGTCTCACCCTAGACACCTTCTCGAGTGGGTCTTAGAAGCCCAGGCATGATTAGTCAGCGTGGTGGGTTCCGCGCTCCAGATGGAGACTCAGCTGGAAGTTAAAGGGAAGAATGACATGGGGAGACCAAGCGCTGGTAAA…	-1297	6.30325e-07	-0.650859	SV top hit
18:43386937:43394764:clu_34145	2977	18_43395289_INDEL_T_TCGTTTATTGCCGAGGACCAGCCCCGGCTGATCCAGGGTATTCGAAGGGGAGACGGCGTCGGCGACTATTTATATGCTAATTAGGGATATAGAGAACAATAGAATGAGGATAGCTCAGTAGGAAATTTCAGTGGAGAAAAGAAGCTGAGTAGCTTGGTTTACGCGGGAGACCAATAAAACTTCAAGACAAGAAGTTTGCACCACTTACGTAGGCCGCAGGCGCCCTCTCGAATAGCGGAAGGTGTCTCACCCTAGACACCTTCTCGAGTGGGTCTTAGAAGCCCAGGCATGATTAGTAAGCGTGGTGGGTTCCGCGCTCCAGATGGAGACTCAGCTGGAAGTTAAAAGAATGACATGGGGAGACCAAGCGTTGGTGAGC…	1293	7.7948e-11	-0.857348	SV top hit
18:55631861:55636561:clu_32524	-131469	18_55500165_INDEL_T_TTAATTGCCGAGGACCAGCCCCGGCTGATCCAGGGTATTCGAAGGGGAGACGGCGTCGGCGACTATTTATATGCTAATTAGGGATATAGAGAACAATAGAATGAGGATAGCTCAGTAGGAAATTTCAGTGGAGAAAAGAAGCTGAGTAGCTTGGTTTACGCGGGAGACCAATAAAACTTCAAGACAAGAAGTTTGCACCACTTACGTAGGCCGCAGGCGCCCTCTCGAATAGCGGAAGGTGTCTCACCCTAGACACCTTCTCGAGTGGGTCTTAGAAGCCCAGGCATGATTAGTAAGCGTGGTGGGTTCCGCGCTCCAGATGGAGACTCAGCTGGAAGTTAAAAGAATGACATGGGGAGACCAAGCGTTGGTGAGCAAG…	1290	2.40434e-12	1.20475	SV top hit
21:64688950:64692692:clu_48941	280403	21_64949347_INDEL_CTGTGTGTGTGTGTGTGTGTGTGTGTCCCTGCCAGGGCCAGCTCTGTGTGTATGTGTGTGTGTGTGTGTGTGTGTGTGTAAGGCATGGTCAGCCTCTTATCACCAGGGCCAGCCGTGTGTGTGTGTGTGTGTGTGTAAGGCATGGTCAGCCTCTCATCACCAGGGCCAGCCGTGTG_C	-175	1.14263e-05	-0.677806	SV top hit
24:45629809:45642439:clu_55475	245547	24_45470681_INDEL_G_GGAGCCCCAAAAATGTTTGACACTGTTTCCACTGTTTCTCCATCTATTTCCCATGAAGTGATGGAACCAGATGCCAT	76	1.69164e-09	-0.756819	SV top hit
25:1966889:1967214:clu_58426	63631	25_2011244_INDEL_TCACCAGCAACCTGCTAGGGCAGCAGGCTGGGGAGGAGCTGGAGACACTCAGAGAAGATTCCTCTTTCCAGAAGTCAA_T	-77	8.44213e-23	-1.37277	SV top hit
26:8650789:8652461:clu_59818	-34274	26_8694035_INDEL_C_CTTTCCTTTTCTCCTTTGCTTTTCGCTTCTCTTCTTTTCACAGCTATTTGTAAGGCCTCCTCAGACAGCCATTTTGCTTTTTTGCATTTTTTTTCCCATGGGGATGGTCTTGATCCCTGTCTCCTGTACGTCACAAACCTCAGTCCAAAGCCTAGGTAGTTAACAGTGGACAATTATCAATAGGCCTGTGGTCATACCGCAATAAGTGTAACAGCATGTATGATTCTATTCGGTTACACAGATAATTAGGGTATTCTTTTAGCAAAGGAAGAGCCCTGGGGCTCTTCCTTCTGGGGGTCTGGTTTTCCAGTTGGTATGTTGTTTCCATAGATACTGGGCAAAAAGCTCAAAGTCCACAGTCCAGCCCAAGATGGAGTCCT…	3629	2.13599e-11	1.2442	SV top hit
29:41753996:41755583:clu_65503	338714	29_41435647_INDEL_T_TGCTGGGAGGGATTGGGGGCAGGAGGAGAAGGGGATGACAGAGGATGAGATGGCTGGA	57	1.41711e-10	-0.736967	SV top hit

## Sheet: README
Supplemental Table S2. SV-QTL candidates for expression and splicing phenotypes, with conditional p-values and effect sizes.
