# Supplementary material for: Pangenome-genotyped structural variation improves molecular phenotype mapping in cattle
Source: HighWire-hosted journal article supplement (doi:10.1101/gr.278267.123), 2024-02-01
Supplement: Supplementary_code.docx [file Supplementary_code.docx]

include: 'snakepit/pangenie_panel.smk'

include: 'snakepit/pangenie_genotyping.smk'

include: 'snakepit/variant_calling.smk'

include: 'snakepit/variant_accuracy.smk'

include: 'snakepit/association_mapping.smk'

include: 'snakepit/LD.smk'

rule all:

input:

## Pangenome panel creation and genotyping

'pangenie_panel/multisample-vcfs/graph-filtered.vcf',

'pangenie_panel/samples.all.pangenie_genotyping_DV.vcf.gz',

## Variant comparison between pangenome panel, short reads, and HiFi reads

'jasmine.vcf',

expand('SVs/{metric}.gz',metric=('sizes','support','GTs')),

expand('SNPs/{metric}.csv',metric=('F1','isec')),

## Linkage disequilibrium analysis of SVs

expand('LD/samples.SV.{r2}.{window}.tags.list',r2=list(range(2,10))+[99],window=(10,100,1000)),

## Molecular QTL mapping

expand('QTL/{QTL}/Testis_{variants}/conditionals.01.txt.gz',QTL=('eQTL','sQTL'),variants=('PanGenie','SR'))

from pathlib import PurePath

rule bcftools_annotate:

input:

'QTL/PanGenie.vcf.gz'

output:

annotation = multiext('LD/annotation.bed.gz','','.tbi'),

annotated = multiext('LD/variants.vcf.gz','','.tbi'),

nice = 'LD/nicer_variants.txt'

threads: 2

shell:

'''

paste <(bcftools query -i 'MAF>0.01' -f '%CHROM\t%POS\t%REF\t%ALT\n' {input}) <(seq 1 $(bcftools index -n {input})) | bgzip -c > {output.annotation[0]}

tabix -p vcf -b 2 -e 2 {output.annotation[0]}

zcat {output.annotation[0]} | mawk ' {{ A[$1"_"$2]=$0 }} END {{ for (key in A) {{ print A[key] }} }} ' | cut -f 5 | awk '$1' | sort -n > {output.nice}

bcftools annotate --threads {threads} -a {output.annotation[0]} -o {output.annotated[0]} -c CHROM,POS,REF,ALT,ID {input}

tabix -p vcf {output.annotated[0]}

'''

rule bcftools_query:

input:

rules.bcftools_annotate.output['annotated']

output:

'LD/SV_IDs.txt'

shell:

'''

bcftools query -i 'abs(ILEN)>=50' -f '%ID\n' {input[0]} > {output}

'''

rule plink2_LD:

input:

vcf = rules.bcftools_annotate.output['annotated'][0],

nicer_variants = rules.bcftools_annotate.output['nice'],

tags = rules.bcftools_query.output

output:

'LD/samples.SV.{r2}.{window}.tags.list'

threads: 4

resources:

mem_mb = 5000,

walltime = '60'

params:

mem = lambda wildcards, threads, resources: threads*resources.mem_mb,

out = lambda wildcards, output: PurePath(output[0]).with_suffix('').with_suffix('')

shell:

'''

plink --vcf {input.vcf} --show-tags {input.tags} --tag-r2 0.{wildcards.r2} --tag-kb {wildcards.window} --threads {threads} --memory {params.mem} --chr-set 30 --vcf-half-call h --list-all --out {params.out}

'''

RepeatMasker --lib ../../../REF_DATA/Repeat_libraries/BosTau9_repeat_library.fasta insertion_sequences.sQTL.fa

cat insertion_sequences.sQTL.fa.out | grep -v "Simple_repeat" | grep -v "Low_complexity" | /cluster/work/pausch/alex/software/RepeatMasker/util/buildSummary.pl - > insertion_sequences.sQTL.fa.tbl

from pathlib import PurePath

wildcard_constraints:

_pass = r'permutations|conditionals|nominals',

chunk = r'\d+',

chrom = r'\d+',

MAF = r'\d+',

vcf = r'(eQTL|gwas)/\S+'

rule normalise_vcf:

input:

lambda wildcards: expand(rules.merge_with_population_SR.output,pangenie_mode='genotyping',allow_missing=True) if wildcards.variants == 'PanGenie' else config['small_variants']

output:

'QTL/{variants}.vcf.gz'

threads: 4

resources:

mem_mb = 2500,

disk_scratch = 50

shell:

'''

bcftools norm --threads {threads} -f {config[reference]} -m -any {input} -Ou | \

bcftools sort -T $TMPDIR -Ou - | \

bcftools annotate --threads {threads} --set-id '%CHROM\_%POS\_%TYPE\_%REF\_%ALT' -o {output} -

tabix -fp vcf {output}

'''

rule exclude_MAF:

input:

rules.normalise_vcf.output

output:

'QTL/{variants}.exclude_sites.{MAF}.txt'

shell:

'''

bcftools view --threads 2 -Q 0.{wildcards.MAF}:minor -Ou {input} |\

bcftools query -f '%ID\n' - > {output}

'''

def get_pass(_pass,input):

if _pass == 'permutations':

return f'--permute {config["permutations"]}'

elif _pass == 'conditionals':

return f'--mapping {input.mapping}'

elif _pass == 'nominals':

return f'--nominal {config.get("nominal",0.05)}'

rule qtltools_parallel:

input:

vcf = rules.normalise_vcf.output,

exclude = rules.exclude_MAF.output,

bed = lambda wildcards: config['mol_QTLs'][wildcards.QTL][wildcards.tissue],

cov = lambda wildcards: config['covariates'][wildcards.QTL][wildcards.tissue],

mapping = lambda wildcards: 'QTL/{QTL}/{tissue}_{variants}/permutations_all.{MAF}.thresholds.txt' if wildcards._pass == 'conditionals' else []

output:

merged = temp('QTL/{QTL}/{tissue}_{variants}/{_pass}.{chunk}.{MAF}.txt.gz')

params:

_pass = lambda wildcards,input: get_pass(wildcards._pass,input),

grp = lambda wildcards: '--grp-best' if wildcards.QTL == 'sQTL' else ''

threads: 1

resources:

mem_mb = 2500,

shell:

'''

QTLtools cis --vcf {input.vcf} --bed {input.bed} --cov {input.cov} --std-err {params._pass} {params.grp} --window {config[window]} --normal --chunk {wildcards.chunk} {config[chunks]} --silent --log /dev/stderr --out /dev/stdout | pigz -p 2 -c > {output}

'''

rule qtltools_gather:

input:

expand(rules.qtltools_parallel.output,chunk=range(0,config['chunks']+1),allow_missing=True)

output:

'QTL/{QTL}/{tissue}_{variants}/{_pass}.{MAF}.txt.gz'

params:

sort_key = lambda wildcards: '-k9,9n -k10,10n' if wildcards.QTL == 'eQTL' else '-k11,11n -k12,12n'

localrule: True

shell:

'''

LC_ALL=C; pigz -p 2 -dc {input} | sort --parallel=2 {params.sort_key} | pigz -p 2 -c > {output}

'''

rule qtltools_FDR:

input:

expand(rules.qtltools_gather.output,_pass='permutations',allow_missing=True)

output:

'QTL/{QTL}/{tissue}_{variants}/permutations_all.{MAF}.thresholds.txt'

params:

out = lambda wildcards, output: PurePath(output[0]).with_suffix('').with_suffix('')

envmodules:

'gcc/8.2.0',

'r/4.2.2'

shell:

'''

Rscript qtltools_runFDR_cis.R {input} 0.05 {params.out}

'''

rule LD:

input:

'QTL/{variants}.vcf.gz'

output:

'QTL/{variants}.stats'

resources:

mem_mb = 5000

shell:

'''

bcftools annotate -x INFO/AF -o $TMPDIR/sample.vcf.gz {input}

tabix -p vcf $TMPDIR/sample.vcf.gz

bcftools view -i 'abs(ILEN)>=50' $TMPDIR/sample.vcf.gz |\

bcftools stats > {output}

#awk '/number of records:/ {{ print $6 }} >> {output}

bcftools +prune -m 0.6 -w 1Mb $TMPDIR/sample.vcf.gz |\

bcftools stats >> {output}

#awk '/number of records:/ {{ print $6 }} >> {output}

'''

from pathlib import PurePath

import subprocess

wildcard_constraints:

chunk = r'\d*'

chromosomes = list(map(str,range(1,30)))

rule all:

input:

'pangenie_DV_imputed/samples.all.pangenie_genotyping_DV.imputed.phased.vcf.gz'

rule determine_scatter:

output:

temp('scatter.txt')

params:

window = config['window'],

overlap = config['overlap']

run:

with open(f'{config["reference"]}.fai') as fai, open(output[0],'w') as fout:

for line in fai:

chrom, size = line.split()[:2]

if chrom not in chromosomes:

continue

for coord in range(1,int(size),params.window):

fout.write(f'{chrom}:{max(1,coord-params.overlap)}-{coord+params.window+params.overlap}\n')

checkpoint bcftools_scatter:

input:

vcf = 'pangenie/samples.all.pangenie_genotyping_DV.vcf.gz',

#scatter = 'scatter.txt'

output:

temp(directory('pangenie_DV_scatter'))

threads: 4

resources:

mem_mb = 2500

params:

scatter = ','.join(chromosomes),

prefix = 'raw.chr'

shell:

'''

bcftools +scatter {input.vcf} --threads {threads} -s {params.scatter} -Oz -p {params.prefix} -o {output}

'''

rule beagle4_impute:

input:

lambda wildcards: f'pangenie_DV_scatter/{"raw" if wildcards.out == "phased" else "raw"}.chr{{chunk}}.vcf.gz'

output:

temp('pangenie_DV_scatter/{out,imputed|phased}.chr{chunk}.vcf.gz')

threads: 8

resources:

mem_mb = 4000,

walltime = '4:00'

params:

prefix = lambda wildcards, output: PurePath(output[0]).with_suffix('').with_suffix(''),

ne = 200,

mem = lambda wildcards, threads, resources: int(resources.mem_mb*threads/1000),

window = config['window'],

beagle = config['beagle5']

shell:

'''

java -Xmx{params.mem}g -Xss50m -jar {params.beagle} \

gt={input} \

nthreads={threads} \

out={params.prefix}

tabix -fp vcf {output}

'''

def empty_vcf(vcf):

#hardcode removing the .imputed to get the original vcf filename

return subprocess.getoutput(f"zgrep -cm1 -v '#' {vcf.replace('.imputed','')}").strip() != "0"

def aggregate_scatter(wildcards):

checkpoint_dir = checkpoints.bcftools_scatter.get(**wildcards).output[0]

return sorted([f'pangenie_DV_scatter/phased.chr{chunk}.vcf.gz' for chunk in glob_wildcards(PurePath(checkpoint_dir).joinpath('raw.chr{chunk,\d*}.vcf.gz')).chunk])

rule merge_vcfs:

input:

aggregate_scatter

output:

'pangenie_DV_imputed/samples.all.pangenie_genotyping_DV.imputed.phased.vcf.gz'

threads: 2

resources:

mem_mb = 2500

shell:

'''

bcftools concat --threads {threads} -a -d exact -o {output} {input}

tabix -p vcf {output}

'''

rule beagle_phase_vcf:

input:

'pangenie_DV_imputed/samples.all.pangenie_genotyping_DV.imputed.vcf.gz'

output:

'pangenie_DV_imputed/samples.all.pangenie_genotyping_DV.imputed.phased.X.vcf.gz'

params:

out = lambda wildcards, output: PurePath(output[0]).with_suffix('').with_suffix(''),

mem = lambda wildcards, threads, resources: int(threads*resources.mem_mb/1024),

ne = 200

threads: 12

resources:

mem_mb = 10000,

walltime = '24:00'

shell:

'''

java -Xmx{params.mem}g -jar {config[beagle5]} \

gt={input} \

out={params.out} \

nthreads={threads}

'''

import os

from pathlib import PurePath

rule all:

input:

'GRM/main.hsq'

rule partition_IDs:

input:

lambda wildcards: config['vcfs'][wildcards.vcf]

output:

SV = 'GRM/{vcf}.SV.ids',

small = 'GRM/{vcf}.small.ids',

_all = 'GRM/{vcf}.all.ids'

shell:

'''

bcftools query -i 'abs(ILEN)>=50' -f '%ID\n' {input} > {output.SV}

bcftools query -e 'abs(ILEN)>=50' -f '%ID\n' {input} > {output.small}

cat {output.SV} {output.small} > {output._all}

'''

rule plink_make_bed:

input:

vcf = lambda wildcards: config['vcfs'][wildcards.vcf]

output:

'bfiles/{vcf}.{chromosome}.bim'

params:

bfile = lambda wildcards, output: PurePath(output[0]).with_suffix(''),

memory = lambda wildcards, threads, resources: int(threads*resources.mem_mb)

threads: 1

resources:

mem_mb = 20000,

walltime = '15'

shell:

'''

plink2 --native --vcf {input.vcf} --threads {threads} --memory {params.memory} --maf 0.01:minor --cow --make-bed --chr {wildcards.chromosome} --out {params.bfile}

'''

rule gcta_grm:

input:

bfiles = expand('bfiles/{{vcf}}.{chromosome}.bim',chromosome=range(1,30)),

ids = 'GRM/{vcf}.{variants}.ids'

output:

'GRM/{vcf}.{variants}.grm.bin'

params:

_input = lambda wildcards, input: '\\n'.join([str(PurePath(I).with_suffix('')) for I in input.bfiles]),

_output = lambda wildcards, output: PurePath(output[0]).with_suffix('').with_suffix('')

threads: 8

resources:

mem_mb = 6000

shell:

'''

echo -e "{params._input}" > $TMPDIR/mbfile

gcta --thread-num {threads} --autosome-num 30 --extract {input.ids} --make-grm-bin --mbfile $TMPDIR/mbfile --out {params._output}

'''

localrules: prep_covars

rule prep_covars:

input:

config['covariates']['eQTL']

output:

'GRM/covar.txt'

shell:

'''

awk '{{for(i=1;i<=NF;i++)a[i][NR]=$i}} END {{for(i in a)for(j in a[i])printf"%s"(j==NR?RS:FS),a[i][j]}}' {input} | awk 'NR>1{{print "0",$0}}' > {output}

'''

localrules: prep_phenotypes

checkpoint prep_phenotypes:

input:

config['genes']['eQTL']

output:

directory('GRM/molecular_phenotypes')

shell:

'''

mkdir -p {output}

zcat {input} | awk -v P={output} '{{if (NR==1){{for(i=7;i<=NF;i++)a[i]=$i}} else {{GENE=$4;for(i=7;i<=NF;i++)b[i]=$i;for(i in a)print 0,a[i],b[i] >> P"/"GENE".phen"}} }}'

'''

def aggregate_phenotypes(wildcards):

checkpoint_output = checkpoints.prep_phenotypes.get(**wildcards).output[0]

return expand("GRM/{{vcf}}.{phenotype}.hsq", phenotype=glob_wildcards(os.path.join(checkpoint_output, "{phenotype}.phen")).phenotype)

localrules: gcta_reml

rule gcta_reml:

input:

grm = expand('GRM/{{vcf}}.{variants}.grm.bin',variants=('SV','small')),

covar = rules.prep_covars.output,

phenotype = 'GRM/molecular_phenotypes/{phenotype}.phen'

output:

'GRM/{vcf}.{phenotype}.hsq'

params:

grm = lambda wildcards, input: '\\n'.join([PurePath(I).with_suffix('').with_suffix('') for I in input.grm]),

out = lambda wildcards, output: PurePath(output[0]).with_suffix('')

shell:

'''

gcta --reml --mgrm-bin {params.grm} --pheno {input.phenotype} --qcovar {input.covar} --reml-no-lrt --reml-alg 2 --reml-maxit 10000 --out {params.out}

'''

#find GRM/molecular_phenotypes/ -type f -name '*.phen' -exec parallel -I@@ -j 6 gcta --reml --grm-bin GRM/main.small --pheno @@ --qcovar GRM/covar.txt --reml-no-lrt --reml-alg 2 --reml-maxit 10000 --out {.}.small ::: {} \+ > /dev/null

localrules: gather_hsq

rule gather_hsq:

input:

aggregate_phenotypes

output:

'GRM/{vcf,main}.hsq'

shell:

'''

awk '$1=="V(G)/Vp" {{print FILENAME,$2,$3}}' {input} | sed 's/\.hsq//g' > {output}

'''

#awk '{if($1=="V(G1)/Vp"){a[FILENAME][1]=$2;a[FILENAME][2]=$3}else{if($1=="V(G2)/Vp"){a[FILENAME][3]=$2;a[FILENAME][4]=$3}else{if($3=="V(G)/Vp"){a[FILENAME][5]=$4;a[FILENAME][6]=$5}}}} END {for(F in a){print F,a[F][1],a[F][2],a[F][3],a[F][4],a[F][5],a[F][6]}}' GRM/molecular_phenotypes/*hsq | sed 's/GRM\/molecular_phenotypes\///g;s/\.hsq//g' > GRM/main.hsq

rule gcta_score:

input:

expand('bfiles/{{vcf}}.{chromosome}.bim',chromosome=range(1,30))

output:

'GRM/{vcf}.score.ld'

params:

_input = lambda wildcards, input: '\\n'.join([str(PurePath(I).with_suffix('')) for I in input]),

_output = lambda wildcards, output: PurePath(output[0]).with_suffix('').with_suffix('')

threads: 24

resources:

mem_mb = 3000,

walltime = '24:00'

output:

''

shell:

'''

echo -e "{params._input}" > $TMPDIR/mbfile

gcta --mbfile $TMPDIR/mbfile --ld-score-region 200 --ld-wind 1000 --out {params._output} --thread-num {threads} --autosome-num 30

'''

rule gcta_stratify:

input:

'GRM/{vcf}.score.ld'

output:

expand('GRM/{{vcf}}.LD_group{N}.ids',N=range(1,5))

params:

_output = lambda wildcards, output: str(PurePath(output[0]).parent)

shell:

'''

Rscript --vanilla {workflow.basedir}/LD_stratify.R {input} {params._output}

'''

wildcard_constraints:

pangenie_mode = r'genotyping|phasing'

def get_sample_location(sample):

fastqs = []

for R in (1,2):

fastqs.append(str(Path(f'{config["fastq"]}{sample}_R{R}.fastq.gz').resolve()))

return fastqs

rule vcfwave:

input:

vcf = rules.normalize_vcf.output

output:

'pangenie_panel.vcfwave.vcf'

threads: 8

resources:

mem_mb = 1500,

walltime = '120h'

shell:

'''

vcfwave -t {threads} --quiet {input} > {output}

'''

rule pangenie_index:

input:

reference = config['reference'],

vcf = rules.vcfwave.output

output:

multiext('pangenie_panel','.cereal','.path_segments.fasta')

params:

prefix = lambda wildcards, output: PurePath(output[0]).with_suffix('')

threads: 1

resources:

mem_mb = 15000

shell:

'''

pangenie -B {params.prefix} -i /dev/null -r {input.reference} -v {input.vcf} -t {threads}

'''

rule pangenie_genotype:

input:

reference = config['reference'],

fastq = lambda wildcards: get_sample_location(wildcards.sample),

pangenie_index = rules.pangenie_index.output

output:

'pangenie_panel/{sample}.all.pangenie_genotyping.vcf'

params:

prefix = lambda wildcards, output: str(PurePath(output[0]).with_suffix('')).replace(f'_genotyping',''),

index = lambda wildcards, input: PurePath(input.pangenie_index[0]).with_suffix('')

threads: 12

resources:

mem_mb = 8000,

scratch = '75G',

walltime = '4h'

shell:

'''

fastp -w {threads} -i {input.fastq[0]} -I {input.fastq[1]} --stdout -g --thread {threads} --html /dev/null --json /dev/null --dont_eval_duplication | seqtk seq -A > $TMPDIR/reads.fa

pangenie -i $TMPDIR/reads.fa -r {input.reference} -v {params.index} -t {threads} -j {threads} -s {wildcards.sample} -g -o {params.prefix}

'''

rule merge_pangenie:

input:

vcf = expand('pangenie_panel/{sample}.all.pangenie_{pangenie_mode}.vcf.gz',sample=config['samples'],allow_missing=True),

tbi = expand('pangenie_panel/{sample}.all.pangenie_{pangenie_mode}.vcf.gz.tbi',sample=config['samples'],allow_missing=True)

output:

'pangenie_panel/samples.all.pangenie_{pangenie_mode}.vcf.gz'

threads: 4

resources:

mem_mb = 10000,

walltime = '24h'

shell:

'''

bcftools merge --threads {threads} -o {output} {input.vcf}

tabix -p vcf {output}

'''

rule extract_SVs:

input:

rules.merge_pangenie.output

output:

'pangenie_panel/samples.all.pangenie_{pangenie_mode}.SVs.vcf.gz'

threads: 2

resources:

mem_mb = 2500

shell:

'''

bcftools view --threads {threads} -i 'abs(ILEN)>50' -o {output} {input}

'''

rule merge_with_population_SR:

input:

DV = config['small_variants'],

pangenie = rules.merge_pangenie.output

output:

'pangenie_panel/samples.all.pangenie_{pangenie_mode}_DV.vcf.gz'

threads: 8

resources:

mem_mb = 2500,

disk_scratch = 75,

walltime = '24h'

shell:

'''

bcftools concat -a -D --threads {threads} {input}| \

grep -v "MONOALLELIC" |\

bcftools norm --threads {threads} -f {config[reference]} -m -any -Ou - | \

bcftools norm --threads {threads} -f {config[reference]} -d none -Ou - | \

bcftools norm --threads {threads} -f {config[reference]} -m +any -Ou - | \

bcftools sort -T $TMPDIR -Ou - | \

bcftools annotate --threads {threads} --set-id '%CHROM\_%POS\_%TYPE\_%REF\_%ALT' -o {output} -

'''

rule compare_pangenie:

input:

pangenie = rules.merge_pangenie.output

output:

'concordance/{sample}.genotype_concordance_summary_metrics'

params:

gc_out = lambda wildcards,output: PurePath(output[0]).parent / f'{wildcards.sample}'

resources:

mem_mb = 15000,

walltime = '60'

envmodules:

'gcc/8.2.0',

'picard/2.25.7'

shell:

'''

picard GenotypeConcordance CALL_VCF={input.pangenie} TRUTH_VCF={config[reference_vcf]} CALL_SAMPLE={wildcards.sample} TRUTH_SAMPLE={wildcards.sample} O={params.gc_out}

'''

################################ Call variants from haplotype-resolved assemblies ################################

#

# steps:

#

# 1.) align contigs to reference using minimap2

# 2.) determine regions (uniquely) covered contigs haplotypes

# 3.) call variants from assemblies using paftools

# 4.) generate bi-allelic vcf file

# 5.) check mendelian consistency in trios and construct graph (multi-allelic vcf)

# 6.) compute some statistics

#

# output:

#

# variant callset produced from the assemblies (represented as bi-allelic VCF: callset-filtered.vcf)

# pangenome graph produced from the variant calls (represented as multi-allelic VCF: graph-filtered.vcf)

#

##################################################################################################################

configfile: "config.json"

samples = config['assemblies'].keys()

samples_parents = [s for s in samples if not s in config['trios']]

scripts = config['scripts']

outdir = config['outdir']

chromosomes = list(map(str,range(1,30))) #[str(i) for i in range(1,23)] + [config['reference']['prefix'] + 'X', config['reference']['prefix'] + 'Y']

frac_missing = config.get('frac_missing',0.2) # skip positions with more than this fraction of missing alleles

# paftools skips contig-alignments shorter than this threshold

min_alignment_len = 50000

###########################################

# 1) Alignment

###########################################

rule align_assemblies:

input:

contigs = lambda wildcards: config['assemblies'][wildcards.sample][int(wildcards.haplotype)],

reference = config['reference']

output:

temp(outdir + "paf/{sample}-hap{haplotype}.sam")

threads: 8

resources:

mem_mb = 8000

params:

mm2_opt = config.get('mm2_opt','-x asm20 -m 10000 -z 10000,50 -r 50000 --end-bonus=100 -O 5,56 -E 4,1 -B 5')

shell:

'''

minimap2 -a {params.mm2_opt} --cs -t {threads} {input.reference} {input.contigs} > {output}

'''

# align assemblies to reference genome

rule align_assemblies_paf:

input:

outdir + "paf/{sample}-hap{haplotype}.sam"

output:

temp(outdir + "paf/{sample}-hap{haplotype}.paf")

resources:

mem_mb = 5000

shell:

'''

paftools.js sam2paf {input} | sort -k6,6 -k8,8n > {output}

'''

###########################################

# 2) Callable regions

###########################################

# align assemblies to reference and produce BAM output

rule align_assemblies_bam:

input:

outdir + "paf/{sample}-hap{haplotype}.sam"

output:

outdir + "bam/{sample}-hap{haplotype}.bam"

threads: 4

resources:

mem_mb = 8000,

disk_scratch = 100

shell:

"""

samtools view --threads {threads} -bS {input} | samtools sort --threads {threads} -T $TMPDIR -o {output} --write-index -

"""

# compute regions covered by at least one contig

rule compute_covered_regions:

input:

outdir + "bam/{sample}-hap{haplotype}.bam"

output:

outdir + "bed/{sample}-hap{haplotype}_covered.bed"

threads: 1

resources:

mem_mb = 5000

shell:

"bedtools bamtobed -i {input} | awk '($3-$2) >= {min_alignment_len}' | bedtools merge > {output}"

# compute regions with per-base coverage < 2

# NOTE: this will NOT remove cases in which there are more than one contig, but all except one contain a deletion)

# CCCCCCCCCCCC

# C----------C

rule compute_coverage:

input:

outdir + "bam/{sample}-hap{haplotype}.bam"

output:

outdir + "bed/{sample}-hap{haplotype}_unique.bed"

threads: 1

resources:

mem_mb=5000

shell:

"bedtools genomecov -bga -ibam {input} | awk '$4 < 2' | bedtools merge > {output}"

rule intersect_beds:

input:

covered= outdir + "bed/{sample}-hap{haplotype}_covered.bed",

unique= outdir + "bed/{sample}-hap{haplotype}_unique.bed"

output:

outdir + "bed/{sample}-hap{haplotype}_callable.bed"

threads: 1

resources:

mem_mb=5000

shell:

"bedtools intersect -a {input.covered} -b {input.unique} > {output}"

rule sort_bed:

input:

"{filename}.bed"

output:

"{filename}-sorted.bed"

shell:

"bedtools sort -i {input} > {output}"

rule callable_regions:

input:

expand(outdir + "bed/{sample}-hap{haplotype}_callable-sorted.bed", sample=samples, haplotype=[0,1])

output:

outdir + "bed/callable-regions.bed"

params:

covered = int((1-frac_missing) * len(samples)*2)

shell:

"bedtools multiinter -i {input} | awk '$4 > {params.covered}' | bedtools merge > {output}"

##########################################

# 3) Variant Calling

##########################################

# call variants from alignments

rule paftools:

input:

paf= outdir + "paf/{sample}-hap{haplotype}.paf",

reference = config['reference']

output:

temp(outdir + "calls/{sample}-hap{haplotype, [0,1]}.vcf")

threads: 1

resources:

mem_mb=10000

shell:

"paftools.js call -L {min_alignment_len} -s {wildcards.sample}_{wildcards.haplotype} -f {input.reference} {input.paf} | sed 's|1/1|1|g' > {output}"

####################################################

# 4) Create bi-allelic VCF and filter it

####################################################

rule compress_vcf:

input:

"{filename}.vcf"

output:

gz="{filename}.vcf.gz",

tbi="{filename}.vcf.gz.tbi"

shell:

"""

bgzip -c {input} > {output.gz}

tabix -p vcf {output.gz}

"""

# create a multisample VCF containing all haplotypes

rule collect_all_haplotypes:

input:

vcfs=expand("{outdir}calls/{sample}-hap{haplotype}.vcf.gz", outdir=outdir, sample=samples, haplotype=[0,1]),

tbi=expand("{outdir}calls/{sample}-hap{haplotype}.vcf.gz.tbi", outdir=outdir, sample=samples, haplotype=[0,1])

output:

outdir + "calls/all-haplotypes.vcf"

threads: 2

resources:

mem_mb=1000

shell:

"bcftools merge --threads {threads} -m none --missing-to-ref {input.vcfs} | python3 {scripts}/assign-variant-ids.py > {output}"

# extract variant ids of callable regions

rule extract_covered_ids:

input:

bed = outdir + "bed/{sample}-hap{haplotype}_callable.bed",

vcf = outdir + "calls/all-haplotypes.vcf"

output:

outdir + "bed/{sample}_{haplotype}.txt"

shell:

"bedtools intersect -a {input.vcf} -b {input.bed} -wa -f 1.0 | cut -f3 > {output}"

# set alleles outside of callable regions to missing

rule set_to_missing:

input:

vcf = outdir + "calls/all-haplotypes.vcf",

bed = expand("{outdir}bed/{sample}_{haplotype}.txt", outdir=outdir, sample=samples, haplotype=[0,1])

output:

outdir + "calls/all-haplotypes-callable.vcf"

threads: 1

resources:

mem_mb=25000,

walltime = '24:00'

shell:

"python3 {scripts}/set-to-missing.py -v {input.vcf} -m {frac_missing} -f {input.bed} > {output}"

# convert haploid VCF into a diploid one by combining haplotypes of each sample

rule write_input:

output:

outdir + "samples.txt"

run:

with open(output[0], 'w') as txt_output:

for sample in samples:

txt_output.write('\t'.join([sample, sample + '_0', sample + '_1']) + '\n')

rule combine_haplotypes:

input:

haps = outdir + "calls/all-haplotypes-callable.vcf",

samples = outdir + "samples.txt"

output:

temp(outdir + "multisample-vcfs/callset.vcf")

threads: 1

resources:

mem_mb=10000,

walltime = '24:00'

shell:

'python3 {scripts}/merge_vcfs.py combine_columns -samples {input.samples} -vcf {input.haps} > {output}'

#################################################################

# 5) Check mendelian consistency for trios and construct graph

#################################################################

# generate a file specifying the trio relationships

rule generate_ped_file:

output:

"{outdir}trios.ped"

run:

with open(output[0], "w") as ped_output:

for trio in config['trios']:

father=config['trios'][trio][0]

mother=config['trios'][trio][1]

ped_output.write('\t'.join([trio, trio, father, mother]) + '\n')

rule generate_samples_file:

output:

"{outdir}trio-samples.txt"

run:

with open(output[0], "w") as sample_output:

for trio in config['trios']:

sample_output.write(trio + '\n')

for sample in config['trios'][trio]:

sample_output.write(sample + '\n')

# remove all variants where there is a mendelian conflict in at least one of the trios

# if no trios are given in config, the vcf does not change.

rule check_mendelian_consistency:

input:

vcf="{outdir}multisample-vcfs/callset.vcf",

ped="{outdir}trios.ped",

samples="{outdir}trio-samples.txt"

output:

vcf="{outdir}multisample-vcfs/callset-filtered.vcf",

tsv="{outdir}multisample-vcfs/mendelian-consistency.tsv"

threads: 1

resources:

mem_mb=10000,

walltime = '24:00'

shell:

"""

python3 {scripts}/mendelian-consistency.py filter -vcf {input.vcf} -samples {input.samples} -ped {input.ped} -o {output.tsv} > {output.vcf}

"""

rule merge_haplotypes:

input:

vcf = outdir + "multisample-vcfs/callset-filtered.vcf",

reference = config['reference']

output:

tmp = temp(outdir + "multisample-vcfs/graph-filtered-tmp-{chr}.vcf")

#params:

# chrom = ','.join([c for c in chromosomes])

threads: 1

resources:

mem_mb=5000,

walltime = '4:00'

shell:

"""

python3 {scripts}/merge_vcfs.py merge -vcf {input.vcf} -r {input.reference} -ploidy 2 -chromosomes {wildcards.chr} -max_edit_distance 0.02 > {output.tmp}

"""

#############################################

# 6) Generate statistics and create plots

#############################################

rule normalize_vcf:

input:

vcfs = expand(outdir + "multisample-vcfs/graph-filtered-tmp-{chr}.vcf.gz",chr=chromosomes),

reference = config['reference']

output:

outdir + "multisample-vcfs/graph-filtered.vcf"

threads: 2

resources:

mem_mb = 5000

shell:

"bcftools concat --threads {threads} -Ou {input.vcfs} | bcftools norm --threads {threads} -m +any -d all -f {input.reference} - > {output}"

rule vcfstats_statistics:

input:

outdir + "multisample-vcfs/graph-filtered.vcf"

output:

txt= outdir + "statistics/vcfstats-stats.txt"

shell:

"rtg vcfstats {input} > {output}"

rule untypable_ids:

input:

outdir + "multisample-vcfs/callset-filtered.vcf.gz"

output:

lists=expand(outdir + "statistics/untypable-ids/{sample}-untypable.tsv", sample=samples_parents),

summary= outdir + "statistics/untypable-ids.tsv"

params:

out= outdir + "statistics/untypable-ids"

shell:

"zcat {input} | python3 {scripts}/untypable-ids.py {params.out} > {output.summary}"

rule indel_histogram:

input:

outdir + "multisample-vcfs/graph-filtered.vcf"

output:

histo= outdir + "statistics/vcftools-stats.indel.hist",

plot= outdir + "statistics/vcftools-plots/indel-histogram.pdf"

shell:

"""

vcftools --vcf {input} --out {outdir}statistics/vcftools-stats --hist-indel-len

cat {output.histo} | python3 {scripts}/plot-callset-statistics.py length {output.plot} 20000

"""

def read_paths(fname,paths):

with open(fname,'r') as fin:

for line in fin:

parts = line.split()

chrom = parts[0].split('_')[0]

if parts[5][0] == '.':

continue

paths[f'{chrom}_{parts[3][2:]}->{chrom}_{parts[4][2:]}'].add(parts[5].split(':')[0].replace('s',f'{chrom}_'))

from collections import defaultdict

def extract_haplotype_walks(haplotypes):

paths = defaultdict(set)

for i in range(1,30):

for haplotype in haplotypes:

read_paths(f'ARS_run_5/{haplotype}.path.{i}.L50.bed',paths)

with open('test.paths','w') as fout:

for key, v in paths.items():

fout.write(key +',' +','.join(v) + '\n')

extract_haplotype_walks(['Os1_hifiasm','Os2_hifiasm','Od1_hifiasm','Od2_hifiasm','B31_hifiasm','B32_hifiasm','B41_hifiasm','B42_hifiasm','O_hifiasm','H_hifiasm','P_hifiasm','H_clr','A_clr','S_ont'])

rule pbmm2_align:

input:

reads = lambda wildcards: config['hifi_samples'][wildcards.sample]

output:

temp(get_dir('pbsv','{sample}.ARS.pbmm2.bam'))

threads: 24

resources:

mem_mb = 3000,

walltime = '4:00'

shell:

'pbmm2 align {config[reference]} {input.reads} {output} --sort --preset CCS -j {threads} --sample {wildcards.sample}'

rule pbsv_discover:

input:

get_dir('pbsv','{sample}.ARS.pbmm2.bam')

output:

get_dir('pbsv','{sample}.ARS.svsig.gz')

resources:

mem_mb = 10000

shell:

'pbsv discover {input} {output}'

rule pbsv_call:

input:

(get_dir('pbsv','{sample}.ARS.svsig.gz',sample=S) for S in config['hifi_samples'])

output:

get_dir('pbsv','samples.pbsv.vcf')

threads: 8

resources:

mem_mb = 3000,

walltime = "24:00"

shell:

'pbsv call --ccs -j {threads} {config[reference]} {input} {output}'

rule pbsv_call_sample:

input:

get_dir('pbsv','{sample}.ARS.svsig.gz')

output:

get_dir('pbsv','{sample}.pbsv.vcf')

threads: 8

resources:

mem_mb = 5000,

walltime = "4:00"

shell:

'pbsv call --ccs -j {threads} --max-ins-length 100000 {config[reference]} {input} {output}'

from pathlib import PurePath

rule all:

input:

'SR_SV/SVs.vcf.gz',

expand('SR_SV/{sample}_{caller}',caller=('insurveyor',),sample=config['HiFi'])

rule picard_add_MQ:

input:

'/cluster/work/pausch/inputs/bam/BTA_eQTL/{sample}.bam'

output:

multiext('SR_SV/{sample}.bam','','.bai')

envmodules:

'gcc/11.4.0',

'picard/3.1.1'

threads: 1

resources:

mem_mb = 15000,

walltime = '24h'

shell:

'''

picard FixMateInformation -I {input} -O {output[0]}

samtools index {output[0]}

'''

rule insurveyor:

input:

rules.picard_add_MQ.output

output:

_dir = directory('SR_SV/{sample}_insurveyor'),

vcf = 'SR_SV/{sample}_insurveyor/out.pass.vcf.gz'

threads: 4

resources:

mem_mb = 7000

shell:

'''

mkdir -p {output._dir}

python /cluster/work/pausch/alex/software/INSurVeyor/insurveyor.py --threads {threads} --samplename {wildcards.sample} {input[0]} {output._dir} {config[reference]}

'''

rule SurVClusterer:

input:

expand(rules.insurveyor.output['vcf'],sample=config['HiFi'])

output:

multiext('SR_SV/cohort.insurveyor','.sv','.vcf.gz','.vcf.gz.tbi')

params:

prefix = lambda wildcards, output: PurePath(output[0]).with_suffix('')

threads: 6

resources:

mem_mb = 4000

shell:

'''

awk '$1=="-" {{print $2, "SR_SV/"$2"_insurveyor/out.pass.vcf.gz"}}' config/SR_SV.yaml > $TMPDIR/samples.fofn

/cluster/work/pausch/alex/software/SurVClusterer/clusterer $TMPDIR/samples.fofn {config[reference]} -t {threads} --min-overlap-precise 0.95 --max-dist-precise 25 --overlap-for-ins -o {params.prefix}

tabix -fp vcf {output[1]}

'''

rule delly_call_denovo:

input:

'/cluster/work/pausch/inputs/bam/BTA_eQTL/{sample}.bam'

output:

'SR_SV/{sample}.delly.denovo.bcf'

envmodules:

'gcc/9.3.0',

'boost/1.74.0',

'gsl/2.6'

threads: 4

resources:

mem_mb = 4000

shell:

'''

/cluster/work/pausch/alex/software/delly/src/delly call -g {config[reference]} -o {output} {input}

#bcftools index {output}

'''

rule delly_merge:

input:

expand(rules.delly_call_denovo.output,sample=config['HiFi'])

output:

'SR_SV/cohort.delly.denovo.bcf'

envmodules:

'gcc/9.3.0',

'boost/1.74.0',

'gsl/2.6'

threads: 4

resources:

mem_mb = 2500

shell:

'''

/cluster/work/pausch/alex/software/delly/src/delly merge --precise --pass --minsize 50 --vaf 0.01 -o {output} {input}

'''

rule delly_call_forced:

input:

bam = '/cluster/work/pausch/inputs/bam/BTA_eQTL/{sample}.bam',

panel = rules.delly_merge.output

output:

'SR_SV/{sample}.delly.forced.vcf.gz'

envmodules:

'gcc/9.3.0',

'boost/1.74.0',

'gsl/2.6'

threads: 4

resources:

mem_mb = 4000

shell:

'''

/cluster/work/pausch/alex/software/delly/src/delly call -g {config[reference]} -v {input.panel} -o $TMPDIR/sample.bcf {input.bam}

bcftools view -o {output} $TMPDIR/sample.bcf

tabix -fp vcf {output}

'''

rule bcftools_merge:

input:

lambda wildcards: expand(rules.delly_call_forced.output,sample=config['HiFi']) if wildcards.caller == 'delly.forced' else (expand(rules.survtyper.output['vcf'],sample=config['HiFi']) if wildcards.caller == 'insurveyor.forced' else expand(rules.insurveyor.output['vcf'],sample=config['HiFi']))

output:

'SR_SV/cohort.{caller}.vcf.gz'

resources:

mem_mb = 10000

shell:

'''

bcftools merge -m id -o {output} {input}

tabix -fp vcf {output}

'''

rule delly_filter:

input:

expand(rules.bcftools_merge.output,caller='delly.forced')

output:

'SR_SV/cohort.delly.filtered.vcf.gz'

envmodules:

'gcc/9.3.0',

'boost/1.74.0',

'gsl/2.6'

threads: 1

resources:

mem_mb = 2500

shell:

'''

/cluster/work/pausch/alex/software/delly/src/delly filter -f germline --altaf 0.01 --minsize 50 --pass -o $TMPDIR/sample.bcf {input}

bcftools view -o {output} $TMPDIR/sample.bcf

tabix -fp vcf {output}

'''

#awk '$1=="-" {print $2, "SR_SV/"$2"_insurveyor/out.pass.vcf.gz"}' ../config/SR_SV.yaml > ../insurveyor.fofn

rule survtyper:

input:

vcf = rules.SurVClusterer.output[1],

bam = '/cluster/work/pausch/inputs/bam/BTA_eQTL/{sample}.bam'

output:

_dir = directory('SR_SV/{sample}_insurveyor_forced'),

vcf = 'SR_SV/{sample}_insurveyor_forced/genotyped.vcf.gz'

threads: 6

resources:

mem_mb = 8000,

walltime = '4h'

shell:

'''

python /cluster/work/pausch/alex/software/SurVTyper/survtyper.py --threads {threads} --samplename {wildcards.sample} {input.vcf} {input.bam} {output._dir} {config[reference]}

'''

rule merge_callers:

input:

delly = rules.delly_filter.output,

insurveyor = expand(rules.bcftools_merge.output,caller='insurveyor.forced')

output:

'SR_SV/SVs.vcf.gz'

threads: 2

shell:

'''

bcftools view {input.delly} -e "SVTYPE=='INS'" -o $TMPDIR/deldel.vcf.gz

tabix -p vcf $TMPDIR/deldel.vcf.gz

bcftools concat -a --threads 2 -D -o $TMPDIR/concat.vcf.gz $TMPDIR/deldel.vcf.gz {input.insurveyor}

tabix -p vcf $TMPDIR/concat.vcf.gz

bcftools view -e INFO/INCOMPLETE_ASSEMBLY!=0 -o {output} $TMPDIR/concat.vcf.gz 1 2 3 4 5 6 7 8 9 10 11 12 13 14 15 16 17 18 19 20 21 22 23 24 25 26 27 28 29

tabix -p vcf {output}

'''

from pathlib import PurePath

## Add reference path for happy container

workflow._singularity_args = f'-B $TMPDIR -B {PurePath(config["reference"]).parent}'

def get_variants(variant,caller):

input_dict = {

'SNPs_PG':'variant_calling/panel.small.vcf.gz',

'SNPs_DV':config['small_variants'],

'SVs_PG': 'variant_calling/panel.SV.vcf',

'SVs_Sniffles': 'variant_calling/samples.denovo.sniffles.vcf.gz'

}

return input_dict[f'{variant}_{caller}']

rule split_vcf:

input:

lambda wildcards: get_variants(wildcards.variant,wildcards.caller)#input_dict[f'{wildcards.variant}_{wildcards.caller}']

output:

multiext('{variant,SVs|SNPs}/{sample}.{caller,PG|DV|Sniffles}.vcf.gz','','.tbi')

params:

regions = ' '.join(map(str,range(1,30))),

SVs = lambda wildcards: {'SVs_Sniffles':"-i 'F_MISSING<0.2&&abs(ILEN)>=50&&INFO/SVTYPE!=\"BND\"'",'SVs_PG':"-i 'F_MISSING<0.2&&abs(ILEN)>=50'"}.get(f'{wildcards.variant}_{wildcards.caller}',"-i 'F_MISSING<0.2'"),

sample = lambda wildcards: f'-s {wildcards.sample}' if wildcards.sample != 'all' else ''

shell:

'''

bcftools view -c 1 -a {params.SVs} {params.sample} -o {output[0]} {input} {params.regions}

tabix -p vcf {output[0]}

'''

rule bcftools_isec:

input:

vcf_truth = expand(rules.split_vcf.output,caller='DV',variant='SNPs',allow_missing=True),

vcf_query = expand(rules.split_vcf.output,caller='PG',variant='SNPs',allow_missing=True)

output:

'SNPs/{sample}.isec'

shell:

'''

bcftools isec -n +1 {input.vcf_truth[0]} {input.vcf_query[0]} | awk ' {{ A[$5]+=1 }} END {{ print "{wildcards.sample}",A["01"],A["10"],A["11"] }}' > {output}

'''

rule gather_isec:

input:

expand(rules.bcftools_isec.output,sample=config['samples'])

output:

'SNPs/isec.csv'

localrule: True

shell:

'''

{{ echo "sample PG DV Mutual" ; cat {input} ; }} > {output}

'''

rule happy:

input:

vcf_truth = expand(rules.split_vcf.output,caller='DV',variant='SNPs',allow_missing=True),

vcf_query = expand(rules.split_vcf.output,caller='PG',variant='SNPs',allow_missing=True),

reference = config['reference']

output:

csv = 'SNPs/{sample}.summary.csv',

others = temp(multiext('SNPs/{sample}','.bcf','.bcf.csi','.extended.csv','.roc.all.csv.gz','.runinfo.json'))

params:

_dir = lambda wildcards, output: PurePath(output.csv).with_suffix('').with_suffix('')

container: 'docker://pkrusche/hap.py'

threads: 2

resources:

mem_mb = 5000,

scratch = '10G'

shell:

'''

/opt/hap.py/bin/hap.py -r {input.reference} --bcf --usefiltered-truth --no-roc --no-json -L --pass-only --scratch-prefix $TMPDIR -X --threads {threads} -o {params._dir} {input.vcf_truth[0]} {input.vcf_query[0]}

'''

rule gather_SR_happy:

input:

expand(rules.happy.output[0],sample=config['samples'])

output:

'SNPs/F1.csv'

localrule: True

shell:

'''

echo -e "variant truth query recall precision truth_TiTv query_TiTv sample" > {output}

for i in {input}

do

awk -v I=$(basename $i) -F',' '$2=="PASS" {{ split(I,a,"."); print $1,$3,$6,$10,$11,$14,$15,a[1] }}' $i >> {output}

done

'''

rule jasmine:

input:

vcfs = expand(rules.split_vcf.output,caller=('PG','Sniffles'),variant='SVs',allow_missing=True)

output:

'SVs/{sample}.jasmine.txt'

params:

_input = lambda wildcards, input: ','.join(input.vcfs).replace('.gz','').replace('SVs','$TMPDIR/SVs')

conda:

'jasmine'

threads: 1

resources:

mem_mb= 5000,

walltime = '60',

scratch = '5G'

shell:

'''

mkdir -p $TMPDIR/SVs

pigz -dc {input.vcfs[0]} > $TMPDIR/SVs/{wildcards.sample}.PG.vcf

pigz -dc {input.vcfs[1]} > $TMPDIR/SVs/{wildcards.sample}.Sniffles.vcf

jasmine --comma_filelist file_list={params._input} threads={threads} out_file=/dev/stdout out_dir=$TMPDIR \

genome_file={config[reference]} --pre_normalize --ignore_strand --allow_intrasample --ignore_type \

max_dist_linear=1 max_dist=1000 > {output}

#|\

#grep -hoP "SUPP_VEC=\K\d+" | awk ' {{ A[$1]+=1 }} END {{ print "{wildcards.sample}",A["01"],A["10"],A["11"] }}' > {output}

'''

rule gather_jasmine:

input:

expand(rules.jasmine.output[0],sample=config['HiFi_samples'])

output:

'SVs/jasmine.csv'

localrule: True

shell:

'''

{{ echo "sample Sniffles PG Mutual" ; cat {input} ; }} > {output}

'''

rule minimap2_align:

input:

lambda wildcards: config['HiFi_samples'][wildcards.sample]

output:

bam = temp('alignments/{sample}.HiFi.bam'),

csi = temp('alignments/{sample}.HiFi.bam.csi')

threads: 12

resources:

mem_mb = 6000,

disk_scratch = 100,

walltime = '24:00'

shell:

'''

minimap2 -axmap-hifi -t {threads} {config[reference]} {input} | samtools sort - -m 3000M -@ 4 -T $TMPDIR --write-index -o {output.bam}

'''

rule sniffles_call:

input:

bam = 'alignments/{sample}.HiFi.bam'

output:

vcf = temp('variant_calling/{sample}.sniffles.vcf.gz'),

snf = temp('variant_calling/{sample}.sniffles.snf')

threads: 4

resources:

mem_mb = 2500

conda:

'sniffles'

shell:

'''

sniffles --input {input.bam} --reference {config[reference]} --sample-id {wildcards.sample} --threads {threads} --vcf {output.vcf} --snf {output.snf}

'''

rule sniffles_merge:

input:

snfs = expand('variant_calling/{sample}.sniffles.snf',sample=config['HiFi_samples'])

output:

vcf = 'variant_calling/samples.sniffles.vcf.gz'

threads: 2

resources:

mem_mb = 2500

conda:

'sniffles'

shell:

'''

sniffles --input {input.snfs} --reference {config[reference]} --threads {threads} --vcf {output.vcf}

'''

rule bcftools_autosomes:

input:

'variant_calling/samples.sniffles.vcf.gz'

output:

'variant_calling/samples.sniffles.autosomes.vcf'

threads: 2

resources:

mem_mb = 4000

params:

regions = ','.join(map(str,range(1,30)))

shell:

'''

bcftools view --threads {threads} -r {params.regions} -o {output} {input}

'''

rule bcftools_stuff:

input:

rules.bcftools_autosomes.output

output:

sizes = 'SVs/sizes.gz',

support = 'SVs/support.gz',

GTs = 'SVs/GTs.gz'

localrule: True

shell:

'''

bcftools query -e 'INFO/SVTYPE=="BND"' -f '%INFO/SVLEN\\n' {input} | pigz -p2 -c > {output.sizes}

bcftools query -e 'INFO/SVTYPE=="BND"' -f '%INFO/SUPP_VEC\\n' {input} | mawk ' {{ print gsub(1,2,$1) }} ' | pigz -p2 -c > {output.support}

bcftools query -e 'INFO/SVTYPE=="BND"' -f '[%GT ]\\n' {input} | sed 's"|" "g' | sed 's"/" "g' | sed 's/\./nan/g' | pigz -p2 -c > {output.GTs}

'''

rule bcftools_split_panel:

input:

expand(rules.merge_pangenie.output,pangenie_mode='genotyping',allow_missing=True)

output:

SV = 'variant_calling/panel.SV.vcf',

small = 'variant_calling/panel.small.vcf.gz'

params:

SV_size = 50,#config['SV_size'],

bcf = '$TMPDIR/normed.bcf'

threads: 2

resources:

mem_mb = 4000,

disk_scratch = 10

shell:

'''

bcftools norm --threads {threads} -f {config[reference]} -m -any -Ou {input} > {params.bcf}

bcftools view -i 'abs(ILEN)>={params.SV_size}' -o {output.SV} {params.bcf}

bcftools view -e 'abs(ILEN)>={params.SV_size}' -o {output.small} {params.bcf}

tabix -fp vcf {output.small}

'''

rule jasmine_intersect:

input:

read = 'variant_calling/samples.sniffles.autosomes.vcf',

asm = 'variant_calling/panel.SV.vcf'

output:

'jasmine.vcf',

'jasmine_overlaps.txt'

params:

_input = lambda wildcards, input: ','.join(input)

conda:

'jasmine'

threads: 2

resources:

mem_mb = 3000,

disk_scratch = 5

shell:

'''

jasmine --comma_filelist file_list={params._input} threads={threads} out_file={output[0]} out_dir=$TMPDIR spec_reads=0 genome_file={config[reference]} min_seq_id=.5 --pre_normalize --ignore_strand --allow_intrasample --normalize_type

grep -vE "SVTYPE=(INV|TRA)" {output[0]} | grep -oP "(SVLEN=-?\d*|SUPP_VEC=\d{{2}})" | sed 's/[A-Z,=,_]*//g' | paste -s -d' \n' > {output[1]}

'''

#jasmine --comma_filelist file_list=smoove_SV/All_filter_type.vcf,eQTL_GWAS/variants/variant_calling/panel.SV.vcf threads=1 out_file=SR_LR.vcf out_dir=$TMPDIR spec_reads=0 genome_file=REF_DATA/ARS-UCD1.2_Btau5.0.1Y.fa min_seq_id=0 --pre_normalize --ignore_strand --allow_intrasample max_dist_linear=1 --normalize_type --dup_to_ins

#bcftools query -f '%CHROM\t%POS\t%INFO/END\t%INFO/SVTYPE\t0\t+\t%POS\t%INFO/END\t%INFO/SUPP_VEC\n' SR_LR.vcf | grep -vE "(INV|TRA)" | sed s'/10$/50,200,50/g' | sed s'/11$/250,100,150/g' | sed s'/01$/50,20,250/g' >> SR_LR.bed

## Assembly rules:

rule minimap2_align_asm:

input:

lambda wildcards: config['asm'][wildcards.sample]

output:

'alignments/{sample}.asm.paf'

threads: 4

resources:

mem_mb = 10000

shell:

'''

minimap2 -cx asm5 -t {threads} --cs {config[reference]} {input} > {output}

'''

rule paftools_call:

input:

'alignments/{sample}.asm.paf'

output:

'variant_calling/{sample}.asm.paf'

threads: 1

resources:

mem_mb = 2000

shell:

'''

sort -k6,6 -k8,8n {input} | paftools.js call -f {config[reference]} {input} > {output.vcf}

'''
